# Supplementary material
Source: PubMed Central journal article supplement (PMC3007152)
Supplement: JCI44021sd.pdf [file JCI44021sd.pdf]

1 **Supplementary Data**

2 **Supplementary Figure 1:** MTM1 co-localizes with desmin in human muscle. Confocal analysis of  
3 transversal and longitudinal sections from two human control muscle biopsies (control 1 is 24 years-  
4 old and control 2 is 42 years-old) showing partial overlap between MTM1 and desmin at the  
5 sarcolemma and at the Z-disc. Scale bars = 50µm.

6 **Supplementary Figure 2: (A)** Desmin failed to immunoprecipitate MTM1 from cardiac muscle (right  
7 panel). Immunoblot of MTM1 in cardiac and skeletal muscle showed similar expression profile in both  
8 muscles (left panel). **(B)** Equivalent expression level of desmin and αB-crystallin in *Mtm1* vs. wild type  
9 cardiac muscle (upper panel). MTM1 knockout expression from heart did not affect desmin solubility.  
10 Sol indicates soluble fraction and Insol means insoluble material after final centrifugation (see  
11 methods) and solubilisation with 8M-urea extraction buffer (lower panel). GAPDH is a loading control.  
12 Data correlated from N=2 individual experiments and significance was set at \*P< 0.05. **(C)** Transversal  
13 and longitudinal sections of wild type and *Mtm1* KO hearts stained with Haematoxylin and eosin (H&E)  
14 showed no myocardial fibrosis (myocyte injury and necrosis) in *Mtm1* KO muscle. All the analysed  
15 mice are 5 weeks old and *Mtm1* KO mice have the characterised severe muscle atrophy at that age.  
16 **(C)** LDH (lactate deshydrogenase) and CK (creatine kinase) level in cardiac muscle from wild type  
17 and *Mtm1* KO mice. No variations were noted in these enzymes. Data correlated from two individual  
18 experiments (n=6 for wild type mice and n=7 for *Mtm1* KO mice) and significance was set at \*P<0.05.  
19 Scale bars = 50µm.

20 **Supplementary Figure 3:** Mapping the interaction domains on MTM1 and desmin. **(A)** Diagrammatic  
21 representation of MTM1 deletion constructs employed in co-immunoprecipitation studies. **(B)** Co-  
22 immunoprecipitation using anti-MTM1 specific antibodies was performed from co-transfected cells with  
23 desmin and MTM1 full length or specified deletion constructs. Immune-bound complexes were  
24 analysed by immunoblot with anti-desmin antibody (top panel) and MTM1 antibody (bottom panel).  
25 MTM1D224-245 and MTM1D233-237 do not interact with desmin. **(C)** Co-immunoprecipitation studies  
26 employing anti-B10 antibodies from cells lysates co-transfected with desmin and B10 tagged wild type  
27 or mutated MTM1 constructs. Immune-bound complexes were revealed with anti-desmin antibody (top  
28 panel) and anti-MTM1 antibody (bottom panel). Levels of ectopically expressed desmin are shown

29 (middle panel). **(D)** Peptide mapping and competition to define the MTM1 binding domain. Top panel:  
30 Desmin overlay on MTM1 peptides encoding the 4 implicated loops (P1:MTM173-187, P2:MTM201-  
31 215, P3:MTM248-262, P4:MTM264-277), revealed with the desmin antibody. Bottom panel: MTM1-FL  
32 spotted on membrane was overlaid with desmin preincubated with excess of peptides (P1-P4). **(E)**  
33 Recombinant desmin alone or combined with specified mutated peptides was incubated with GST-  
34 MTM1 or GST. Coomassie blue stained gels showed GST and GST-MTM1 recombinant proteins  
35 (middle panel) and purified recombinant desmin (bottom panel) that were used for GST-pull down  
36 competition experiment. **(F)** Peptide mapping experiment using overlapping peptides of the 342-456  
37 desmin sequence dotted on nitrocellulose membrane and overlaid by GST or GST-MTM1  
38 recombinant proteins.

39 **Supplementary Figure 4:** Characterization of *Mtm1* knockdown C2C12 cell line and exploring desmin  
40 expression and localization in MTM1 deficient cells and muscle. **(A)** Expression of MTM1 and desmin  
41 during muscle cell differentiation employing MTM1 and desmin-specific antibodies (left panel).  
42 Quantification of mRNA levels of *desmin* and *Mtm1*, during myoblast differentiation was determined by  
43 quantitative RT-PCR compared to *Gapdh* or *Mhc* (right panel). **(B)** Characterization of *Mtm1*  
44 knockdown (KD) C2C12 cells. 3 clones were generated and 2 are presented here for protein and  
45 mRNA quantification comparatively to XLCNM myoblast carrying mutations leading to depletion  
46 (F238fs) or strong decrease (R241C) of MTM1 expression. Data correlated from N=3 individual  
47 experiments, n=3 separate cell culture extracts (middle and right panels) and significance was set at  
48 \*P < 0.05. **(C)** Overexpression of desmin in *Mtm1* knockout (KO) muscle. Western blot analysis of  
49 muscle extracts from control and *Mtm1* KO muscles at 2 weeks and 5 weeks employing anti-desmin  
50 and anti-GAPDH specific antibodies. The 200-kDa bands detected by the desmin antibody in *Mtm1*  
51 KO muscle correspond potentially to a detergent-resistant desmin tetramer. Quantification of protein  
52 and mRNA levels of *Desmin* in control and *Mtm1* KO skeletal muscle (at 2 and 5 weeks). N= 4  
53 individual experiments and n = 2 mice per experiment, significance was set at \*P < 0.05. **(D)** Isolated  
54 fibres from *Mtm1* KO (2-weeks) muscle showed Desmin aggregates in the subsarcolemmal and  
55 intermyofibrillar compartments (arrowheads) compared to wild type muscle fibres. Scale bars  
56 represent 20µm.

57 **Supplementary Figure 5:** Specific accumulation of desmin in *Mtm1* KO muscle. Immunolocalisation  
58 of syncolin, dystrophin, utrophin,  $\alpha$ -actinin (Z-disc protein) and titin (M-line protein) in 2-week old  
59 control and *Mtm1* KO muscles. Accumulation of desmin was observed in *Mtm1* KO muscle fibers  
60 (arrowheads) but not the other tested protein. Scale bars represent 20 $\mu$ m.

61 **Supplementary Figure 6:** Impact of MTM1 on desmin filaments assembly. **(A)** MTM1 affects desmin  
62 filament structure. Recombinant desmin (10  $\mu$ M) was mixed with increasing concentrations of  
63 recombinant MTM1 (cleaved from GST tag) and desmin filament assembly was monitored by electron  
64 microscopy after 60 min of assembly. Addition of MTM1 (4  $\mu$ M) led to the formation of ribbon-like,  
65 bifurcating and branching filaments with more variable width and length. Excess of MTM1 (8-32  $\mu$ M)  
66 inhibit completely filaments formation. **(B)** Desmin filament collapse/aggregation in *Mtm1* KO and  
67 knockdown myoblasts is not promoted by desmin phosphorylation. Immunoblot of desmin before  
68 (Total) and after elution from Ser/thr Phospho-enrichment column. ERK1/2 and GAPDH were analysed  
69 as positive and loading controls, respectively.

70 **Supplementary Figure 7:** Rescue of desmin filaments in *Mtm1* KO myoblasts. **(A)** Overexpression of  
71 wild type MTM1 but not mutated constructs (in the interaction sites with desmin) re-establishes normal  
72 desmin filament network in *Mtm1* KO myoblast (see also supplementary figure 7A). **(B)** XLCNM  
73 mutation R421Q and the artificial mutations S420D and C375S could re-establish normal desmin  
74 filament in *Mtm1* KO cells but not the XLCNM mutation R241C, suggesting that only MTM1 mutations  
75 situated in the interaction sites with desmin are not able to rescue desmin filaments network. **(C)**  
76 Quantification of the impact of all tested MTM1 mutations on filament network in *Mtm1* KO cells.  
77 Approximately 100 transfected cells were counted over 3 independent experiments. The significance  
78 was set at \*P<0.05.

79 **Supplementary Figure 8:** Effects of MTM1 mutations on desmin filaments **(A)** Overexpression of wild  
80 type MTM1 but not mutated constructs (in the interaction sites with desmin) re-establishes normal  
81 desmin filament network in *Mtm1* Knockdown cells similarly to *Mtm1* KO cells (Supplementary Figure  
82 7). **(B)** Overexpression of wild type MTM1 does not impact on desmin network in control C2C12 cells  
83 (Scramble) but overexpression of mutated MTM1 proteins carrying point mutations within the  
84 interaction sites with desmin (artificial or patient's mutations) lead to collapsed/aggregating desmin  
85 filaments. These mutated proteins may promote a dominant negative effect by binding the

86 endogenous MTM1 protein (C) and disrupting its interaction with desmin. Quantification of the impact  
87 of MTM1 mutations on filament network in C2C12 cells. Approximately 80 to 100 transfected cells per  
88 experiment were counted over 3 independent experiments. The significance was set at \*P<0.05.

89 **Supplementary Figure 9:** Impact of MTM1 mutations in the desmin interaction sites on PIs  
90 phosphatase activity in vitro. (A) PtdIns(3,5)P<sub>2</sub> dephosphorylation to PtdIns5P by wild type or mutated  
91 MTM1 constructs (H181A, Y206A, S209A and K269A) alone or combined to desmin recombinant  
92 protein. (B) Coomassie blue stained gel of the MTM1 GST-fusion constructs employed for the  
93 enzymatic assay (right panel). (C) Quantification of the phosphatase activity: intensities of PtdIns5P  
94 and PtdIns(3,5)P<sub>2</sub> spots were measured at A(480/504) and expressed as a ratio on the recombinant  
95 protein quantity. Fluoremetric measurements were made twice and their averages were used. Data  
96 correlated from two individual experiments and significance was set at \*P<0.05. (D) Desmin did not  
97 bind directly to lipids. A fat blot of specified lipids was overlayed with recombinant desmin (10 µg/ml),  
98 followed by probing with desmin specific antibodies.

99 **Supplementary Figure 10:** (A) MTM1 mutations fail to restore mitochondria network in *Mtm1* KO  
100 cells. Overexpression of wild type MTM1 but not mutated constructs (artificial and XLCNM mutations)  
101 did not rescue mitochondrial shape/network in *Mtm1* KO myoblast. (B) Quantification of the impact of  
102 MTM1 mutations on mitochondrial shape in *Mtm1* KO cells compared to MTM1 wild type (WT).  
103 Approximately 150 transfected cells were counted over 2 independent experiments. The significance  
104 was set at \*P<0.05. (C). PtdIns(3,5)P<sub>2</sub> immunodetection in wild type and *Mtm1* KO/knockdown cells  
105 showed a similar profile as mitochondria. Perinuclear accumulation of PtdIns(3,5)P<sub>2</sub> and mitochondria  
106 in MTM1 deficient cells showed also partial overlapping between the PI and MitoTracker, suggesting a  
107 potential role of MTM1 substrate PtdIns(3,5)P<sub>2</sub> in mitochondrial homeostasis or a cytotoxic effect of PI  
108 accumulation on mitochondrial function.

109 **Supplementary Figure 11.** Disruption of MTM1-Desmin interaction does not impact on MTs and MFs  
110 networks. (A) Overexpression of wild type or mutated MTM1 constructs (that did not bind desmin) in  
111 C2C12 cells did not affect microtubules (MTs) and actin filaments (MFs) architecture. C2C12 cells  
112 transfected with specified B10-tagged MTM1 constructs were processed with anti-B10 and anti-β  
113 tubulin or anti-actin antibodies. (B) The morphology of MTs and MFs of *Mtm1* KD C2C12 cells. Scale  
114 bar=50 µm.

115 **Supplementary Figure 12:** (A) Desmin and mitochondria collapse in XLCNM patient myoblasts,  
116 *Mtm1* knockdown cells and *Mtm1* KO muscle. Control vs. MTM1F238fs patient myoblasts and  
117 scramble vs. *Mtm1* KD cells were processed for imaging following incubation with MitoTracker red and  
118 anti-desmin specific antibodies. Desmin and mitochondria collapsed around nuclei in XLCNM and  
119 *Mtm1* KD C2C12 cells. (B) Desmin aggregates were present in *Mtm1* KD myotubes. Control or *Mtm1*  
120 KD C2C12 myotubes were processed for imaging with anti-desmin, anti-titin or anti-myotilin specific  
121 antibodies. Desmin formed aggregates in KD cells whereas, titin (A-I line) and myotilin (z-line) showed  
122 similar localisation between control and *Mtm1* KD myotubes. Scale bar=50  $\mu\text{m}$ . (C) Mitochondria  
123 network is also altered in *Mtm1* KD myotubes with a specific accumulation between nuclei myotubes  
124 (arrowheads). Scale bar=50 $\mu\text{m}$ . (D) Subsarcolemmal and intermyofibrillar mitochondria are  
125 disorganised in *Mtm1* KO muscles. Longitudinal muscle sections from control and *Mtm1* KO mice  
126 were probed with anti-cytochrome *c* antibody. Mitochondria accumulation was detected in muscle  
127 transversal sections from *Mtm1* KO mice after injection with the RhodamineU6 probe. Scale bars=50  
128  $\mu\text{m}$ .

129 **Supplementary Figure 13:** Mitochondrial fission/fusion and susceptibility to apoptosis in *Mtm1*  
130 Knockdown cells are not affected. (A) Mitochondrial dynamics of control and *Mtm1* KD C2C12 cells  
131 were monitored over 300 sec by time-lapse microscopy (left panel). Quantification of mitochondrial  
132 fission and fusion events in control and *Mtm1* KD C2C12 cells (right panel). Mitochondria were  
133 counted individually in 3 distinct regions of the cell. Around 50 mitochondrial entities were scored as  
134 dividing (fission) or fusing (fusion) or neither (no event) per region from 9 control C2C12 cells (N=9)  
135 and from 11 *Mtm1* KD cells (N=11). Data correlated from 2 independent experiments and significance  
136 was set at \*P < 0.05. (B) *Mtm1* KD did not impact on mitochondrial transmembrane potential. Control  
137 and *Mtm1* KD C2C12 cells were incubated with JC-1 and were analysed by FACS. Samples  
138 previously treated with 1 $\mu\text{M}$  staurosporine (STS) were also included in the assay. No significant shift in  
139 the profile of control versus *Mtm1* KD samples was observed. (C) Knockdown *Mtm1* in muscle cells  
140 did not increase susceptibility to apoptotic events. Control and *Mtm1* KD C2C12 cells were treated  
141 with (STS) and the morphology of their nuclei (stained with H $\ddot{o}$ echst) was analysed by confocal  
142 microscopy (left panel). Cells with condensed or fragmented DNA (with or without STS treatment)  
143 were scored (right panel). Data correlated from 2 independent experiments using 4 different cell

144 batches. Approximately 120 cells were counted for each sample and significance was set at \*P < 0.05.

145

146 **Supplementary table 1:** List of XLCNM patients carrying mutations compatible with prolonged life

147 compared to the neonatal cases. Major part of these patients requires respiratory physiotherapy

148 however no cardiac incidence or cardiac parameters defects were noted. (\*) A symptomatic female

149 carrier (77-year-old) with restrictive respiratory dysfunction with a hemidiaphragmatic paresis, leading

150 to death at 84 years of age. (#) Electrocardiogram showed repolarisation abnormalities.

151 Echocardiogram disclosed pulmonary arterial hypertension (50 to 55 mm Hg), the right cavities were

152 not dilated and there was no left dysfunction. Holter-ECG recorded bursts of supraventricular extra

153 systoles.

| Mutation (aa) | Recurrence | Phenotype, age | Respiratory support | Cardiomyopathy | Ref. |
|---------------|------------|----------------|---------------------|----------------|------|
| M1V           | 1          | M, 5 yrs       | Yes                 | NO             | (1)  |
| Y68D          | 1          | M, 3 yrs       | Yes                 | NO             | (1)  |
| L70F          | 2          | M, 35 yrs      | Yes                 | NO             | (1)  |
| N180K         | 1          | M, 67 yrs      | Yes at 55 yrs       | NO             | (1)  |
| P226T         | 1          | M, 12 yrs      | Yes                 | NO             | (1)  |
| R241C         | 13         | M, 11 yrs      | Yes                 | NO             | (1)  |
| R241C         | 13         | M, 7 yrs       | Yes                 | NO             | (1)  |
| R241C         | 13         | M, 10 yrs      | Yes                 | NO             | (1)  |
| W346C         | 1          | M, 3 yrs       | Yes                 | NO             | (1)  |
| L498Stop (*)  | 1          | M, 84 yrs      | Yes                 | (#)            | (2)  |

154

155

156

157

158

159

160 **Supplementary table 2.** Primers used in this study for Q-PCR after reverse transcription. *Gapdh* and  
161 *Mhc* were used as standard controls.

| <b>GENE</b>   | <b>Forward primers</b>  | <b>Reverse primers</b>   | <b>PCR (pb)</b> |
|---------------|-------------------------|--------------------------|-----------------|
| <i>Mtm1</i>   | Catgcgtcacttgggaactgtgg | Gcaattcctcgagcctcttt     | 235             |
| <i>Desmin</i> | Gctctcaactccgagaaaacc   | Tgtgtagcctcgctgacaac     | 121             |
| <i>Gapdh</i>  | Agctttccagaggggcatccaca | Ccagtatgactccactcacggcaa | 444             |
| <i>Mhc</i>    | Gaactgaaggagagaggtcga   | Gattaccaatgcctttag       | 492             |

162 **Supplementary movie 1.** Time lapse (10 min) of mitochondrial motility in scramble C2C12 cells.

163 **Supplementary movie 2.** Time lapse (10 min) of mitochondrial motility in *Mtm1* KD C2C12 cells. Due  
164 to collapsed mitochondria in *Mtm1* KD cells, movies from both scramble and *Mtm1* KD cells were  
165 treated similarly with Imaris Imaging software (Bitplane Inc.) to track individual mitochondria.

166

## 166 **SUPPLEMENTARY METHODS**

### 167 **Plasmid and constructs**

168 Several constructs used in this study were subcloned into eukaryotic or prokaryotic vectors using the  
169 Gateway® recombination technology (Invitrogen, Carlebad CA, USA). The full-length open-reading  
170 frames for human *MTM1* (GenBank U46024), *MTM1*-GRAM (aa 1-162), *MTM1*-ΔGRAM (aa 146-603),  
171 *MTM1*-Cter (aa 545-603) were subcloned into the Gateway entry vector pENTR using BP  
172 recombination system as described by manufacture recommendation (Invitrogen). *MTM1* constructs  
173 were transferred to Gateway destination vectors for eukaryotic (pSG5 from Stratagene, with a tag  
174 corresponding to the B10 epitope of estrogen receptor) or prokaryotic expression (pGex4T3,  
175 Invitrogen). Human full-length desmin in pcDNA.3-*DESMIN* and pcDNA.3-*DESMIN*-myc vectors were  
176 kind gifts of Dr. P. Vicart and Dr. A. Lilienbaum (INSERM, Paris, France). For recombinant protein  
177 production, pDS5-*DESMIN* was kindly provided by Dr. H. Bar (Dep. of Molecular Genetics DKFZ,  
178 Heidelberg, Germany). Human Neurofilament Light-chain vector pcDNA 3.1/myc-His vectors  
179 (Invitrogen) was a gift from Dr. A. Bolino (Milano, Italy) and Sumo cDNA was a gift from Dr. F. Klein  
180 (IGBMC, Illkirch, France). The panel of deletions and amino acid changes was engineered by PCR-  
181 based mutagenesis from the cDNA encoding the wild-type protein (*MTM1* or Desmin) using Deep vent  
182 DNA polymerase (Ozyme) or PFU DNA polymerase (Agilent technologies). All constructs were verified  
183 by sequencing.

### 184 **Antibodies**

185 Monoclonal anti-*MTM1* antibody 1G1 and polyclonal antibodies 2347 and 2827 were generated and  
186 characterized previously (3-5). A new polyclonal antibody (2868) was produced and directed against  
187 the mouse *MTM1* C-ter end (cys-TSSSSQMVPHVQTHF). Anti-B10 and anti-Myc monoclonal  
188 antibodies were home engineered (IGBMC, Illkirch-France). Monoclonal anti-titin, monoclonal anti-  
189 myotilin and anti-pan plectin antibodies were kindly provided by Dr. D. Mornet (ERI25, INSERM,  
190 Montpellier, France). Anti-frataxin antibodies were provided by Dr. H. Puccio (IGBMC, Illkirch, France).  
191 The following commercial antibodies were used in this study: Mouse monoclonal anti-desmin antibody  
192 (clone D33) (DAKO, Germany), mouse monoclonal anti-αB-crystallin (clone 1B6.1-3G4, Stressgen,  
193 assay designs), mouse monoclonal anti-α-actinin, mouse monoclonal anti-actin, mouse anti-GAPDH



194 (clone 6C5) (Euromedex, France), mouse anti- PtdIns(3,5)P<sub>2</sub> (Echelon Biosciences Inc.) and mouse  
195 anti-Phospho ERK1/2 (Cell signalling Inc.), polyclonal antibodies anti-desmin (Y20), rabbit polyclonal  
196 antibody anti-Myc, rabbit anti-prohibitin (Abcam, Cambridge), rabbit anti-cytochrome C (Santa Cruz  
197 Biotechnology, Inc.). For peroxidase coupled secondary antibodies goat anti-mouse, goat anti-rabbit  
198 and donkey anti-goat antibodies were from Jackson ImmunoResearch Inc (England).

### 199 **Yeast Two-hybrid**

200 Yeast two-hybrid screening was performed by Hybrigenics, S.A., (Paris, France)  
201 (<http://www.hybrigenics-services.com>). The coding sequence for amino acids 150-603 of human  
202 *MTM1* (GenBank accession number gi: 4557896) was PCR-amplified and cloned into pB27 as a C-  
203 terminal fusion to LexA (N-LexA-MTM1-C) and into pB66 as a C-terminal fusion to Gal4 DNA-binding  
204 domain (N-Gal4-MTM1-C). The constructs were checked by sequencing the entire insert and used as  
205 a bait to screen a random-primed human adult/fetal skeletal muscle cDNA library constructed into,  
206 pB27, pB66 and pP6 vector derived from the original pBTM116 (6), pAS2ΔΔ (7) and pGADGH (8)  
207 plasmids, respectively. For the LexA bait construct, 89 million clones (9-fold the complexity of the  
208 library) were screened using a mating approach with Y187 (mat $\alpha$ ) and L40ΔGal4 (mata) yeast strains  
209 as previously described (7). For the Gal4 construct, 99.6 million clones (10-fold the complexity of the  
210 library) were screened using the same mating approach with Y187 (mat $\alpha$ ) and CG1945 (mata) yeast  
211 strains. A total of 49 His<sup>+</sup> colonies were selected on a medium lacking tryptophan, leucine and  
212 histidine, and supplemented with 0.5 mM 3-aminotriazole (only for the Gal4 screen) to handle bait  
213 autoactivation. The prey fragments of the positive clones were amplified by PCR and sequenced at  
214 their 5' and 3' junctions. The resulting sequences were used to identify the corresponding interacting  
215 proteins in the GenBank database (NCBI) using a fully automated procedure. Four clones encoding  
216 the Human class III intermediate filament desmin were identified in the initial screen.

### 217 **GST-fusion proteins production and pull down**

218 MTM1 constructs (full-length, ΔGRAM, GRAM, C-ter) were transferred by recombination into the  
219 Gateway pGex4T3 vector and transformed into BL21-Rosetta 2 strain (Novagen). For negative control  
220 the empty pGex4T3 vector (GST alone) was used. Bacteria were grown in 2X-YT (1% Yeast extract,  
221 1% bactotryptone, 2,5mM NaOH and 0,5% NaCl) enriched medium until mid-log phase (OD reaches

222 0.5). Induction was performed with 1mM IPTG at 16°C during 12 hr. Recombinant proteins were  
223 extracted from cell pellets with lysis buffer (50mM Tris-Cl pH 8.0, 100mM NaCl, 1mM EDTA). Fresh  
224 DTT (1mM), PMSF (1mM) and complete protease inhibitor tablet (Roche) supplemented with 1mM  
225 Leupeptin and 1mM pepstatin A (SIGMA). Lysozyme (SIGMA) was added to 1mg/ml and bacteria  
226 were incubated on ice and mixed occasionally by inversion. To increase solubility of recombinant  
227 proteins we added 0,1% Sarcosyl and 0,5% of Triton X-100 and mixed in rotamixer at 4°C overnight.  
228 Bacterial lysates were spun down at 20,000 rpm and supernatants containing soluble proteins were  
229 loaded onto a Gultathione Sepharose resin (GE-Healthcare) overnight at 4°C. Bound GST-fusion  
230 proteins were washed with lysis buffer 4 times and ones with lysis buffer adjusted to 500 mM NaCl.  
231 Purified GST-fusion protein-beads were submitted to final washes in lysis buffer without NaCl. Non-  
232 transfected and transfected COS-1 cells with pcDNA3.1-desmin (see cell culture and tranfection) were  
233 homogenized with ice-cold low-salt Tris buffer (10mM Tris-Cl pH 7.6, 140 mM NaCl, 5mM EDTA, 5mM  
234 EGTA, 0,5% Triton X-100, 2mM PMSF). After centrifugation the insoluble material was resuspended in  
235 ice-cold high-salt buffer (10mM Tris-Cl pH 7.6, 1,5 M KCl, 140 mM NaCl, 5mM EDTA, 5mM EGTA,  
236 0,5% Triton X-100, 2mM PMSF), homogenised and pelleted by centrifugation. The resulting pellet was  
237 washed with the same buffer without KCl and NaCl to remove excess of salt and solubilised again in  
238 ice-cold low salt Tris buffer to get high amount of soluble desmin. The same procedure was applied to  
239 C2C12 myotube homogenates and also to muscle homogenate using a Dounce homogenizer. The  
240 resulting homogenates were mixed with GST-fusion MTM1-beads and incubated at 4°C for 4 to 12 hr.  
241 After several washes with the low-salt Tris buffer, beads were resuspended in Laemmli buffer, heated  
242 for 3 min at 95°C, and proteins were separated by SDS-PAGE. Desmin was revealed with  
243 corresponding specific antibodies described above.

#### 244 **Co-immunoprecipitation**

245 The entire procedure was carried out at 4°C. Whole cell extracts from COS-1 (co-transfected with  
246 specified constructs) and C2C12 myotubes were obtained by homogenization in Co-IP buffer (50 mM  
247 Tris-Cl pH 7.5, 100 mM NaCl, 5mM EDTA, 5mM EGTA, 1mM DTT, 0,5% Triton X-100, 2mM PMSF)  
248 supplemented with complete protease inhibitor tablet (Roche) and 1mM Leupeptin and 1mM pepstatin  
249 A (Sigma). Cells were homogenized in a Dounce homogenizer and passed five times through 25G  
250 needle to disperse aggregates. After centrifugation (7000 g, 10 min) the insoluble material was frozen

251 in liquid nitrogen and submitted twice to the same extraction procedure with Co-IP buffer. All soluble  
252 fractions were pooled to have optimal levels of proteins of interest. For whole muscle lysate  
253 preparation, fresh *tibialis anterior* muscles were dissected from adult mice and homogenized with a  
254 Dounce homogenizer in ice-cold Co-IP buffer supplemented with 0.05% (w/v) SDS. Cycles of 10 min  
255 homogenization spaced by 10 min incubation on ice were repeated 3 times. After 30 min centrifugation  
256 at 30,000 rpm, pellets were treated by 2 cycles of freeze-thaw in ice and homogenized as described  
257 above in small volumes. Finally the supernatants were pooled for the pull-down experiment. Soluble  
258 homogenates (from cells or muscle) were pre-cleared with 50 ml of G-sepharose beads (GE-  
259 Healthcare) for 1 hr and supernatants were incubated with the specific antibodies directed against the  
260 protein of interest or against the fusion tag (B10 and Myc) at 4°C for 12 to 24 hr. Protein G-sepharose  
261 beads were then added for 4 hr to capture the immune complex. Beads were washed 4 times with Co-  
262 IP buffer and 2 times with high stringency co-IP buffer (with 500 mM NaCl). For all experiments, two  
263 negative controls consisted of a sample lacking the primary antibody and a sample incubated with  
264 another primary antibody from the same serotype as the antibody of interest. Resulting beads were  
265 eluted with Laemmli buffer and submitted to SDS-PAGE followed by western blot.

#### 266 **Desmin purification**

267 For the expression and purification of desmin, BL21-Rosetta-2 bacteria were transformed with pDS5-  
268 *DESMIN* and the isolation of inclusion bodies were performed according to the initial protocol of Nagi  
269 and Thogerson with the modification provided by Herrmann et al. (9). After resuspension of bacterial  
270 pellets with the Dounce homogenizer, we added 0.2% Triton X-100 followed by 10 mM MgCl<sub>2</sub>, 50  
271 mg/ml DNAase I (Roche) and 2 mM PMSF. The permeabilized bacteria were gently agitated with tight-  
272 fitting pistil until the viscosity of the solution was low and the inclusion bodies were harvested by  
273 centrifugation, resuspended in the corresponding washing buffer, and successively transferred back to  
274 the Dounce homogenizer pre-cooled on ice. Inclusion bodies were homogenized with KCl-Tris buffer  
275 (10 mM Tris-Cl pH 7.5, 1 mM EDTA, 1 mM DTT, 2 mM PMSF and 1.5 M KCl). After centrifugation this  
276 procedure was repeated with the same buffer without KCl (Tris buffer). Finally the pellet was  
277 homogenized in 10 mM Tris pH 7.5 and 0.1 mM EDTA to remove salt. The pellet from the last  
278 centrifugation was dissolved in 10 mM Tris-Cl, pH 7.5 with 9.5 M Urea. Solubilised desmin was  
279 collected by centrifugation at 100,000 g for 1 hr at 20°C and the resulting supernatant was submitted

280 to column purification. Desmin was passed through Fast-flow DEAE-Sepharose (SIGMA) equilibrated  
281 with column buffer (10 mM Tris-Cl pH 7.5, 1 mM DTT and 8 M urea). Econo-columns (Bio-Rad) were  
282 used. Bound proteins were eluted by a salt gradient (0-300 mM NaCl) in column buffer and fractions  
283 were analysed by SDS-PAGE. Peak fractions were pooled, diluted to decrease salts and directly  
284 applied to a CM-Sepharose (SIGMA) equilibrated with column buffer. Purified desmin was eluted by  
285 gradient salt as described above and analysed by SDS-PAGE. To avoid protein carbamoylation, all  
286 urea buffers were stirred in the presence of a mixed-bed ion exchanger resin (TMD-8, M8157,  
287 SIGMA). To obtain soluble complexes, desmin filaments were dialyzed in steps of decreasing urea  
288 concentration (6M, 4M, 2M) for 1 hr dialysis period at RT (weight cut off of 10,000 Dalton). The  
289 solubilisation-dialysis buffer (5 mM Tris-HCl pH 8.4, 1 mM EDTA, 0.1 mM EGTA, and 1 mM DTT) was  
290 used as buffer for all steps and for the final dialysis to remove traces of urea. Finally, desmin filaments  
291 were dialyzed overnight at 4 °C.

#### 292 **Electron microscopy and negative staining**

293 To visualize desmin filaments, desmin was solubilised at 0.4 mg in solubilisation buffer and assembly  
294 was started by the addition of an equal volume of filament buffer (45 mM Tris-Cl pH 7.0 and 100 mM  
295 NaCl). Filament assembly was performed at RT and samples were taken at 10 seconds, 5 min, 10  
296 min, and 60 min). Assembly was stopped by the addition of the same volume of assembly buffer (25  
297 mM Tris-Cl pH 7.5, 50 mM NaCl) containing 0.2 % glutaraldehyde (SIGMA). 5-8 µl of protein  
298 suspension was then delivered to a glow-discharged, carbon coated copper electron microscopy grid  
299 (10, 11). Filaments bound to the support were washed with distilled water and stained by incubation  
300 with 2% uranyl acetate for 15 seconds. The staining solution was removed and the grid was air dried  
301 and observed under a Philips CM120 transmission electron microscope operating at 100 kV with a  
302 LaB6 filament. Areas covered with molecules were recorded under low dose condition, at a  
303 magnification of 100 nm on a Pelletier cooled CCD camera (Model 794, Gatan, Pleasanton, CA).  
304 Measurement of filaments length and diameter was performed on images enlarged five times from the  
305 original images (from at least 2 independent experiments) using Image J software (National Institute of  
306 Health, USA). To assess the impact of MTM1 on desmin filament, GST-MTM1, GST-MTM1S209A and  
307 GST-Sumo (control) were purified as described before and GST was cleaved by thrombin (SIGMA).

308 Recombinant proteins were dialysed against desmin solubilisation buffer (see above) and mixed with  
309 desmin at equimolar ratio (or using increasing amount of MTM1) before starting filament assembly.

### 310 **Co-sedimentation assays**

311 Effect of MTM1 on desmin assembly was also investigated by a sedimentation assay (10) with the  
312 following modifications. Briefly, desmin (10  $\mu$ M) was incubated at 37°C in assembly buffer for 1 hr with  
313 GST-MTM1 (GST-MTM1S209A and GST alone were used as controls) at the same concentration (10  
314  $\mu$ M each). The mixtures were centrifuged at 100,000 g for 10 min and identical volumes of supernatant  
315 and pellet were subjected to SDS-PAGE followed by Coomassie blue staining. The second experiment  
316 consisted to increase the amount of GST-MTM1 (4, 8 and 16  $\mu$ M) mixed with desmin to test the impact  
317 on polymerisation. Samples were centrifuged and analysed as described above. Gels were scanned to  
318 quantify the fraction of GST-MTM1 and desmin in pellet and supernatant fractions.

### 319 **Western and far western blots**

320 Protein samples were homogenized in Laemmli buffer, boiled 5 min at 95°C, separated on 10% SDS-  
321 polyacrylamide gels and transferred onto nitrocellulose membranes (Schleicher and Schuell). After  
322 blocking the membranes overnight at 4 °C in 5% milk in TBST, primary antibodies were applied at the  
323 specific dilution in 5% milk in TBST buffer and incubated for 1 hr at RT or overnight at 4°C depending  
324 on the specificity of the antibodies and manufacturer's instructions. The membranes were washed 5  
325 times with TBST, and horseradish peroxidase-conjugated secondary antibodies (Jackson Immuno  
326 Research Laboratories) were applied for 1 hr. After 5 times washing with TBST, membranes were  
327 developed using superSignal west Pico kit (Thermo scientific, PEIRCE) following the manufacturer's  
328 instructions. For far western experiments, nitrocellulose membranes were preincubated 15 min with  
329 fresh 1X probe dilution buffer from (PBS, 0.3% BSA, 0.1% goat serum) as described (12). Protein  
330 probes were diluted in the appropriate concentration in the 1X probe dilution buffer and incubated on  
331 the nitrocellulose for 2 hr at RT. After four washes with PBS, the membrane was blocked with 5% milk  
332 in TBST for 1 hr at RT and incubated with the primary antibody followed by the horseradish  
333 peroxidase-conjugated secondary antibody, and finally revealed as described above.

### 334 **Peptides and dot blot**

335 All peptides were 9-Fluorenylmethyloxycarbonyl (Fmoc) coupled (Peptide synthesis platform, IGBMC,  
336 Illkirch, France) and synthesized using solid phase 431A or 433A automatic synthesisers (Applied  
337 Biosystem). Peptides were purified by HPLC and verified by mass spectrometry. For dot blot, diluted  
338 peptides at the indicated concentration were spotted on a 0.2  $\mu$ M nitrocellulose membrane using Bio-  
339 Dot SF microfiltration apparatus (Bio-Rad, France) following the manufacturer's instructions. Purified  
340 recombinant proteins were applied at the described dilutions and spotted membranes were incubated  
341 with the primary antibody followed by the horseradish peroxidase-conjugated secondary antibody and  
342 finally revealed using superSignal west Pico kit (Thermo scientific, PIERCE). For competition  
343 experiments, recombinant proteins were pre-incubated with competitor peptides for 1-12 hr at 4°C  
344 before the incubation step with spotted nitrocellulose membrane.

#### 345 **Stable *Mtm1* knockdown cell generation**

346 Knockdown (KD) *Mtm1* and control C2C12 cells were generated in triplicates following the protocol  
347 used by Dalkilic et al. (13). Potential sites for siRNA sequences were identified using the BD  
348 Biosciences Clontech RNAi Designer (<http://bioinfo.clontech.com/rnaidesigner/>) and Invitrogen's  
349 BLOCK-iT RNAi Designer (<https://rnaidesigner.invitrogen.com/rnaiexpress/>). The targeted sequence  
350 sites were used to design the hairpin sequences for insertion into the pSirenRetroQ vector (BD  
351 Biosciences). The following sequence was used: ACGGATTCTGCTCTAATAC for mouse *Mtm1*.  
352 Forward (GAT CCA CGG ATT CTG CTC TAA TAC TTC AAG AGA GTA TTA GAG CAG AAT CCG TTT  
353 TTT TGC TAG CG) and reverse (AAT TCG CTA GCA AAA AAA CGG ATT CTG CTC TAA TAC TCT  
354 CTT GAA GTA TTA GAG CAG AAT CCG TG) primers were synthesized, annealed, and ligated to the  
355 pSirenRetroQ vector using the EcoRI and BamHI restriction sites according to the manufacturer's  
356 protocol. Plasmids were then transfected into the 293E (ecotropic) packaging cell line using  
357 Lipofectamine 2000 reagent (Invitrogen). The resulting viruses were harvested after 2 days, passed  
358 through a 0.45- $\mu$ m-pore-size filter to remove any detached cells. C2C12 cells were plated on six-well  
359 plates (50,000/well), and a day later, the viruses were mixed with Polybrene and incubated with the  
360 cells for 15 min. The plates were centrifuged for 30 min at 37°C, at 2500 rpm, and the viral  
361 supernatant was then removed. The next day, infected cells were plated in selection medium  
362 containing puromycin (2.5  $\mu$ g/ml).

363 **Generation of adeno-associated virus (AAV)-*Mtm1* and intramuscular delivery**

364 Mouse *Mtm1* cDNA (AF073996 [GenBank], NCBI) was cloned into a pENTR1A Gateway entry vector  
365 (Invitrogen), and then recombined into the pAAV destination vector. Viral particles were produced and  
366 purified as previously described (3) with the following modification. Production and purification of AAV  
367 constructs for transduction was performed by the Genetic Engineering platform of the IGBMC  
368 (Strasbourg, France). Adenovirus-free pseudotyped AAV2/1 preparations were generated by tri-  
369 transfection of AAV-293 cells with the plasmids pAAV2-insert, pAAV-RC (plasmid which contains the  
370 AAV2 rep and AAV1 or 2 cap genes), and pHelper (encoding adenovirus helper functions).  
371 Recombinant vectors were purified by double cesium chloride ultracentrifugation gradients from cell  
372 lysates or by affinity onto Heparin column, followed by dialysis against sterile PBS and concentration.  
373 Physical particles were quantified by real time PCR and vector titers are expressed as viral genomes  
374 per ml (vg/ml). rAAV titres used in these experiments were  $5-7 \times 10^{11}$  viral genomes per ml (vg/ml). 5 to  
375 6 week-old *Mtm1* KO mice were anesthetized by intraperitoneal injection of 5  $\mu$ l/body gram of  
376 ketamine (20 mg/ml, Virbac) and xylazine (0.4%, Rompun, Bayer). Tibialis anterior (TA) muscles were  
377 injected with 25  $\mu$ l of AAV-*Mtm1* or AAV preparations or with sterile PBS solution. Animals were  
378 housed in a temperature-controlled room (19–22°C) with a 12:12-h light/dark cycle. Mice were  
379 humanely killed by CO<sub>2</sub> inhalation followed by cervical dislocation. TA muscles were dissected 2-4  
380 weeks after injection and frozen in nitrogen-cooled isopentane and liquid nitrogen for histological and  
381 immunoblot assays, respectively. Care and manipulation of mice were performed in accordance with  
382 national and European legislations on animal experimentation, and approved by the institutional ethical  
383 committee.

384 **Cell culture, transfection and immunofluorescence**

385 COS-1 cells were grown in Dulbecco medium supplemented with 5% FCS. C2C12 mouse myoblast  
386 cells (control and *Mtm1* KD) were maintained in Dulbecco medium supplemented with 20% FCS for  
387 proliferation and differentiated by adding the differentiation medium (Dulbecco medium + 5% HS).  
388 Cells were then left from 2 to 9 days to differentiate into myotubes. Human and mice primary myoblast  
389 cultures were generated from human biopsy explants and 2 weeks-old mice. Briefly, after a cell  
390 proliferation phase from muscle explants, harvested cells were then sorted by FACS using an anti-  
391 CD56/NCAM antibody (for Human cells) and anti-CD34+ (for mice cells) the selected cells were left for

392 proliferation in Dulbecco medium supplemented with 20% FCS and 2% Ultrosor G (Bioprepra).  
393 Characterization of the XLCNM patients cells used in this study was previously reported (14). Cells  
394 were differentiated into myotubes by decreasing FCS in the medium to 2%. All cell culture media were  
395 supplemented with gentamycin (400 U/ml). In the case of C2C12 control and *Mtm1* KD cells, 2 µg/ml  
396 puromycin were added to the medium for selection as mentioned above. COS-1 cells were transfected  
397 with Fugene 6 (Roche, France) and C2C12 cells with Lipofectamine 2000 (Invitrogen) according to the  
398 manufacturer's instructions. For immunofluorescence, cells were grown on glass coverslips (Nalge  
399 Nunc Inc.) and transfected with the appropriate DNA. To observe mitochondria, cells were incubated  
400 for 10 min with Mitotraker Red (Molecular probes, Invitrogen) diluted in culture medium. After fixation  
401 with 4% paraformaldehyde or cold methanol and saturation with fetal calf serum, cells were  
402 permeabilized and incubated with the appropriate primary antibodies. Samples were washed and  
403 incubated with goat anti-mouse or goat anti-rabbit or donkey anti-mouse or donkey anti-rabbit  
404 secondary antibodies coupled to Alexa fluor488 or Alexa fluor595 (Invitrogen) and observed with a  
405 Leica DM microscope for epifluorescence or with a Leica SP2 MP confocal microscope.

#### 406 **Time-lapse microscopy**

407 Cells incubated with MitoTracker were washed with culture medium twice prior to analysis. Cells were  
408 observed during 10 min using the Leica DM IRE2 videomicroscope and Leica SP5 confocal video-  
409 microscope. Cells were maintained at 37 °C in a sealed observation chamber during image  
410 acquisition. Short exposure time and a neutral density filter were used to minimize photobleaching and  
411 phototoxicity. Collection of image stacks was produced using the Metamorph Imaging System  
412 (Universal Imaging Corp, Downingtown, PA, USA) or Imaris Imaging software (Bitplane Inc.). To avoid  
413 measuring movement due to cell retraction, only cells that did not move during the observation were  
414 analysed. Individual mitochondria spots were tracked using Image J software (National Institute of  
415 Health, USA) and vector lengths (movement of particles between two consecutive frames) were  
416 exported to Microsoft Excel and the velocities of the particles were calculated in µM/second.

#### 417 **Electron microscopy**

418 C2C12 cells (*Mtm1* KD and control) were fixed in 2.5% glutaraldehyde with 0.1M sodium cacodylate  
419 buffer (PH 7.2) for 24 hr at 4°C, washed in 0.1M cacodylate buffer for 30 min and post-fixed in 1%



420 osmium tetroxide in 0.1M cacodylate buffer for 1 hr at 4°C. Following stepwise dehydration with  
421 increasing concentrations of ethanol and embedding in Epon 812, ultrathin sections (70nm) were  
422 stained with uranyl acetate and lead citrate and observed with a Morgagni 268D electron microscope.

### 423 **Muscle tissue preparation and mitochondria isolation**

424 The *Mtm1* knockout (KO) mouse line (genetic background 129/Sv) was generated previously (15).  
425 Mice were housed in plastic cages in a temperature-controlled environment with a 12 hr light/dark  
426 cycle and free access to food and water. The investigation complied with the Guide for the Care and  
427 Use of Laboratory Animals published by the National Institutes of Health. The animals were  
428 euthanized by rapid cervical dislocation and experiments were carefully designed to minimize the  
429 number of animals and their suffering. Muscles were treated as described previously (16). Briefly,  
430 dissected muscles were immediately frozen in liquid nitrogen-cooled isopentane and stored at -80°C  
431 or were directly solubilised with the appropriate buffer for biochemistry (protein extraction and co-  
432 immunoprecipitation) or molecular biology (RNA extraction for quantitative RT-PCR) experiments.  
433 Microsomal fractions were prepared from freshly dissected pooled *tibialis anterior* muscles from at  
434 least two mice as described (17). Muscles were homogenized using a Dounce homogenizer (10-15  
435 strokes) in solution A (20 mM Na<sub>4</sub>P<sub>2</sub>O<sub>7</sub>, 20 mM Na-PO<sub>4</sub>, pH 7.4, 0.303 M sucrose, 0.5 mM EDTA, 1  
436 mM MgCl<sub>2</sub>) supplemented by 2 mM PMSF and protease inhibitors cocktail. Homogenates were  
437 centrifuged for 15 min at 20,000 *g*, and the pellet was re-homogenized. Combined supernatants were  
438 filtered through six layers of cheesecloth and centrifuged for 15 min at 25,000 *g*. The pellet was  
439 discarded. Solid KCl was added to the supernatant, to a final concentration of 0.6 M. After  
440 centrifugation for 35 min at 200,000 *g*, the pellet was resuspended in solution B (20 mM Tris-maleate,  
441 pH 7.4, 0.303 M sucrose, 0.6 M KCl, and the same protease inhibitors as in solution A). After  
442 incubating for 1 hr, KCl-washed microsomes were pelleted for 35 min at 200,000 *g* and resuspended  
443 in solution B without KCl. All steps were performed at 4°C. Muscle mitochondria were isolated using  
444 established methods (18). Freshly dissected muscles were minced (4°C), followed by homogenization  
445 (teflon pestle) in ice-cold MSH buffer (210 mM mannitol, 70 mM sucrose, 5 mM HEPES, pH 7.4) with 1  
446 mM EGTA. The homogenates were pelleted to remove the nuclear fraction (10 min; 680 *g* at 4°C) and  
447 the supernatant transferred to a pre-chilled tube and re-centrifuged (15 min; 6800 *g* at 4°C). The pellet  
448 was washed once in ice-cold MSH buffer (without EGTA) and used as the mitochondrial-enriched

449 fraction. The resulting supernatants were further centrifuged at 100,000 *g* for 30 min to generate a  
450 cytosolic fraction.

#### 451 **Lipid binding assays**

452 To test the potential binding of desmin to lipids we used the PIP Strips commercial system (Echelon  
453 Bioscience Inc) according to manufacturer's instructions. Briefly, after blocking membranes with PBS  
454 with 1% non-fat-dry milk for 1 hr at RT, purified recombinant desmin was tested at increased  
455 concentrations (1 $\mu$ g-10  $\mu$ g/ml) diluted in the same buffer and incubated in contact with PIP Strips  
456 overnight at 4°C. Bound desmin was revealed by the anti-desmin goat antibody Y20 (Santa Cruz  
457 biotechnology) followed by the peroxidase coupled Donkey anti-goat second antibody.

#### 458 **Phosphatase activity assays**

459 To test the impact of desmin on MTM1 phosphoinositide phosphatase activity we performed *in vitro*  
460 and *ex-vivo* independent experiments (19). For the *in vitro* assay, recombinant GST-MTM1 fusion  
461 protein was expressed and purified as described above and mixed with purified desmin recombinant  
462 protein. The protein mixture was incubated overnight at 4°C and diluted to the final concentration of  
463 1mg/ml in 50ml of 50 mM ammonium acetate pH 6.0. For *ex-vivo* assays, SW13vim- cells were co-  
464 transfected with desmin and MTM1 constructs (pcDNA3-desmin-Myc and pSG5-B10-MTM1) or with  
465 NF-L and MTM1 constructs (pcDNA3.1-NFL-His-Myc, and pSG5-B10-MTM1). After cell lysis the  
466 MTM1-Desmin and MTM1-NF-L complexes were immunoprecipitated using the monoclonal anti-B10  
467 antibody. Immune-complexes were washed several times in washing buffer (see Co-  
468 immunoprecipitation part) and then in 50 mM ammonium acetate, pH 6.0. The appropriate volume of  
469 beads (1mg/ml in 50 ml ammonium acetate buffer) and recombinant protein mixtures were then  
470 assayed for phosphatase activity in 50 mM ammonium acetate pH 6.0, with either BODIPY FL-labelled  
471 phosphatidylinositol 3,5-bisphosphate and phosphatidylinositol 3-phosphate (Echelon Research  
472 Laboratories, UT USA) according to Taylor and Dixon (20). Lipids were extracted according to Blight  
473 and Dyer (21), separated on Silica Gel G60 TLC, and visualized under UV light. Phosphatase activity  
474 was also quantified after scrapping the fluorescent spots from TLC plates followed by lipid extraction  
475 and measuring the fluorescence using the Varioscan Flash (Thermo Electron Corp.) at fixed  
476 wavelengths (480/504).

477 **Desmin solubility assays**

478 Cells or muscles were treated as described before in co-immunoprecipitation part with the following  
479 modifications. Extracts were obtained by homogenization in extraction buffer (50 mM Tris-Cl pH 7.5,  
480 50 mM NaCl, 5mM EDTA, 5mM EGTA, 1mM DTT, 0,5% Triton X-100, 2mM PMSF) supplemented  
481 with complete protease inhibitor tablet (Roche), 1mM Leupeptin and 1mM pepstatin A (SIGMA). Cells  
482 were homogenized with dounce homogenizer and passed five times through a 25G needle to disperse  
483 aggregates. Equal weight of *tibialis anterior* muscles were homogenized with a Dounce homogenizer  
484 in ice-cold extraction buffer supplemented with 0.05% (w/v) SDS. A cycle of 10 min homogenization  
485 spaced by 10 min incubation on ice was repeated 3 times. Cell and muscle extracts were treated by 2  
486 cycles of freeze-defreeze in liquid nitrogen and centrifuged during 30 min at 30,000 rpm at 4°C. Pellets  
487 were collected as the insoluble material and solubilized in extraction buffer supplemented with 8M  
488 Urea.

489 **Cytochrome oxidase, LDH and CK activities**

490 C2C12 Cells (control and *Mtm1* KD) were grown in 6 wells plates until confluence and were  
491 trypsinized, washed twice with PBS and homogenized in HEPES extraction buffer (20 mM HEPES pH  
492 7.4, 0,1% Triton X100, 1mM EDTA). Protein concentration was fixed at 1mg/ml and triplicates of each  
493 sample were analysed using the Cytochrome c oxydase assay kit (SIGMA) according to the  
494 manufacture's protocol. The activity of the enzyme was calculated in U/ml/g of proteins. Lactate  
495 deshydrogenase (LDH) activity was measured in the direction of pyruvate to lactate formation by  
496 following the oxidation of NADH at 340 nm (Cormay diagnostic kit). Creatine kinase (CK) activity was  
497 estimated by an enzyme linked assay, the reduction of NADPH being followed at 340 nm (Cormay  
498 diagnostic kit). All analyses were carried out at 25°C and the activities were expressed as IU per mg of  
499 muscle protein incubated. The total protein content in cardiac muscle samples was determined by the  
500 method of Bradford.

501 **Cytochrome C release, MPT assay and ATP content**

502 Freshly isolated mitochondria (from wild type and *Mtm1* KO mice) were washed and resuspended in  
503 MSH buffer (210 mM mannitol, 70 mM sucrose, 5 mM HEPES, pH 7.4). Equal amounts of  
504 mitochondria (2 mg protein/ml) were incubated at 25°C for 10 min with CaCl<sub>2</sub> (Ca<sup>2+</sup>) to a 0.2 mM final

505 concentration. Small aliquots were removed to determine total cytochrome c, and released cytochrome  
506 c was determined after pelleting the remaining mitochondria (4°C; 16,000 *g* 5 min) and collecting the  
507 supernatants. To assess membrane permeability transition (MPT), swelling of mitochondria (1 mg  
508 protein/ml) was monitored in MSH buffer containing 2 mM Tris-phosphate, 5 mM succinate and 1  $\mu$ M  
509 rotenone by continuous measurement of the decrease in absorbance (540 nm) using a 96-well reader  
510 (Biotek Instrument GmbH, France). A concentration of 4 nmol Ca<sup>2+</sup>/mg protein was used in the  
511 measurement. All measurements were in triplicate from two independent experiments.  
512 For ATP content, samples were prepared as described previously (22) with slight modifications. Equal  
513 weight of *tibialis anterior* muscles from wild type and *Mtm1* KO mice were rapidly processed for boiling  
514 in double-distilled water (10 min) followed by homogenization. ATP concentration was measured in  
515 triplicate by the Enliten® ATP Assay System (Promega Corporation, Madison, USA).

#### 516 **Apoptotic assays and JC-1 treatment**

517 Cells were treated with 1 mM Staurosporine (STS, SIGMA) for 6 hr. Nuclei were analysed by confocal  
518 microscopy using Hoechst dye. TUNEL experiments were carried out using the In situ Cell Death  
519 Detection Kit, Fluorescein (Roche, France) according to the manufacturer's instructions. Mitochondrial  
520 membrane potential was assayed using the MitoProb™ JC-1 assay kit for flow cytometry (Molecular  
521 Probes, Netherlands). Cells were stained with 2  $\mu$ M JC-1 for 15 min at 37°C, 5% CO<sub>2</sub>, washed with  
522 PBS and analyzed by flow cytometry using 488 nm excitation with 585 emission filters.

#### 523 **Reverse transcription and quantitative PCR**

524 Total RNA was purified from muscles of 2 and 5 week-old male mice and C2C12 (control and *Mtm1*  
525 KD) cells using Trizol reagent (Invitrogen) according to manufacturer's instructions. cDNAs were  
526 synthesised from 2 to 5  $\mu$ g of total RNA using Superscript II reverse transcriptase (Invitrogen) and  
527 random hexamers. Quantitative PCR amplification of cDNAs was performed on Light-Cycler 480 and  
528 Light-Cycler 24 instruments (Roche) using 58°C as melting temperature. The *Gapdh* and *Mhc* gene  
529 expression were used as control because of the non-variation in their expression between wild type  
530 and *Mtm1* KO muscles or between *Mtm1* KD and control C2C12 cells. Primers are summarized in  
531 Table S2.

532

533 **Statistical analysis**

534 Throughout the paper, the distribution of data points is expressed as mean  $\pm$  SEM. Statistical analysis  
535 was performed using the Mann-Whitney *U* test or the unpaired Student's test and multiple statistical  
536 comparisons between samples were performed by one-way analysis of variance followed by a  
537 Bonferroni's t-test posthoc correction to obtain a better evaluation of the variability between samples  
538 from the same group and samples from each compared group. The Statview program (version 5.0;  
539 SAS Institute Inc, Cary, NC) was used and statistical significance was set at \**P* < 0.05.

540 **SUPPLEMENTARY REFERENCES**

- 541 1. Biancalana, V., Caron, O., Gallati, S., Baas, F., Kress, W., Novelli, G., D'Apice, M.R., Lagier-  
542 Tourenne, C., Buj-Bello, A., Romero, N.B., et al. 2003. Characterisation of mutations in 77  
543 patients with X-linked myotubular myopathy, including a family with a very mild phenotype.  
544 *Hum Genet* 112:135-142.
- 545 2. Penisson-Besnier, I., Biancalana, V., Reynier, P., Cossee, M., and Dubas, F. 2007. Diagnosis  
546 of myotubular myopathy in the oldest known manifesting female carrier: a clinical and genetic  
547 study. *Neuromuscul Disord* 17:180-185.
- 548 3. Buj-Bello, A., Fougerousse, F., Schwab, Y., Messaddeq, N., Spehner, D., Pierson, C.R.,  
549 Durand, M., Kretz, C., Danos, O., Douar, A.M., et al. 2008. AAV-mediated intramuscular  
550 delivery of myotubularin corrects the myotubular myopathy phenotype in targeted murine  
551 muscle and suggests a function in plasma membrane homeostasis. *Hum Mol Genet* 17:2132-  
552 2143.
- 553 4. Laporte, J., Blondeau, F., Gansmuller, A., Lutz, Y., Vonesch, J.L., and Mandel, J.L. 2002. The  
554 PtdIns3P phosphatase myotubularin is a cytoplasmic protein that also localizes to Rac1-  
555 inducible plasma membrane ruffles. *J Cell Sci* 115:3105-3117.
- 556 5. Tosch, V., Vasli, N., Kretz, C., Nicot, A.S., Gasnier, C., Dondaine, N., Oriot, D., Barth, M.,  
557 Puissant, H., Romero, N.B., et al. Novel molecular diagnostic approaches for X-linked  
558 centronuclear (myotubular) myopathy reveal intronic mutations. *Neuromuscul Disord*.
- 559 6. Vojtek, A.B., and Hollenberg, S.M. 1995. Ras-Raf interaction: two-hybrid analysis. *Methods*  
560 *Enzymol* 255:331-342.
- 561 7. Fromont-Racine, M., Rain, J.C., and Legrain, P. 1997. Toward a functional analysis of the  
562 yeast genome through exhaustive two-hybrid screens. *Nat Genet* 16:277-282.
- 563 8. Chien, C.T., Bartel, P.L., Sternglanz, R., and Fields, S. 1991. The two-hybrid system: a  
564 method to identify and clone genes for proteins that interact with a protein of interest. *Proc*  
565 *Natl Acad Sci U S A* 88:9578-9582.
- 566 9. Herrmann, H., and Aebi, U. 1998. Structure, assembly, and dynamics of intermediate  
567 filaments. *Subcell Biochem* 31:319-362.

- 568 10. Herrmann, H., Kreplak, L., and Aebi, U. 2004. Isolation, characterization, and in vitro  
569 assembly of intermediate filaments. *Methods Cell Biol* 78:3-24.
- 570 11. Bar, H., Strelkov, S.V., Sjöberg, G., Aebi, U., and Herrmann, H. 2004. The biology of desmin  
571 filaments: how do mutations affect their structure, assembly, and organisation? *J Struct Biol*  
572 148:137-152.
- 573 12. Hnia, K., Hugon, G., Masmoudi, A., Mercier, J., Rivier, F., and Mornet, D. 2006. Effect of beta-  
574 dystroglycan processing on utrophin/Dp116 anchorage in normal and mdx mouse Schwann  
575 cell membrane. *Neuroscience* 141:607-620.
- 576 13. Dalkilic, I., Schienda, J., Thompson, T.G., and Kunkel, L.M. 2006. Loss of FilaminC (FLNC)  
577 results in severe defects in myogenesis and myotube structure. *Mol Cell Biol* 26:6522-6534.
- 578 14. Dorchies, O.M., Laporte, J., Wagner, S., Hindelang, C., Warter, J.M., Mandel, J.L., and  
579 Poindron, P. 2001. Normal innervation and differentiation of X-linked myotubular myopathy  
580 muscle cells in a nerve-muscle coculture system. *Neuromuscul Disord* 11:736-746.
- 581 15. Buj-Bello, A., Laugel, V., Messaddeq, N., Zahreddine, H., Laporte, J., Pellissier, J.F., and  
582 Mandel, J.L. 2002. The lipid phosphatase myotubularin is essential for skeletal muscle  
583 maintenance but not for myogenesis in mice. *Proc Natl Acad Sci U S A* 99:15060-15065.
- 584 16. Hnia, K., Hugon, G., Rivier, F., Masmoudi, A., Mercier, J., and Mornet, D. 2007. Modulation of  
585 p38 mitogen-activated protein kinase cascade and metalloproteinase activity in diaphragm  
586 muscle in response to free radical scavenger administration in dystrophin-deficient Mdx mice.  
587 *Am J Pathol* 170:633-643.
- 588 17. Rezniczek, G.A., Konieczny, P., Nikolic, B., Reipert, S., Schneller, D., Abrahamsberg, C.,  
589 Davies, K.E., Winder, S.J., and Wiche, G. 2007. Plectin 1f scaffolding at the sarcolemma of  
590 dystrophic (mdx) muscle fibers through multiple interactions with beta-dystroglycan. *J Cell Biol*  
591 176:965-977.
- 592 18. Ott, M., Robertson, J.D., Gogvadze, V., Zhivotovsky, B., and Orrenius, S. 2002. Cytochrome c  
593 release from mitochondria proceeds by a two-step process. *Proc Natl Acad Sci U S A*  
594 99:1259-1263.
- 595 19. Rohde, H.M., Tronchere, H., Payraastre, B., and Laporte, J. 2009. Detection of myotubularin  
596 phosphatases activity on phosphoinositides in vitro and ex vivo. *Methods Mol Biol* 462:265-  
597 278.
- 598 20. Taylor, G.S., and Dixon, J.E. 2003. PTEN and myotubularins: families of phosphoinositide  
599 phosphatases. *Methods Enzymol* 366:43-56.
- 600 21. Bligh, E.G., and Dyer, W.J. 1959. A rapid method of total lipid extraction and purification. *Can*  
601 *J Biochem Physiol* 37:911-917.
- 602 22. Tao, G.Z., Looi, K.S., Toivola, D.M., Strnad, P., Zhou, Q., Liao, J., Wei, Y., Habtezion, A., and  
603 Omary, M.B. 2009. Keratins modulate the shape and function of hepatocyte mitochondria: a  
604 mechanism for protection from apoptosis. *J Cell Sci* 122:3851-3855.
- 605
- 606

## Supplementary Figure 1

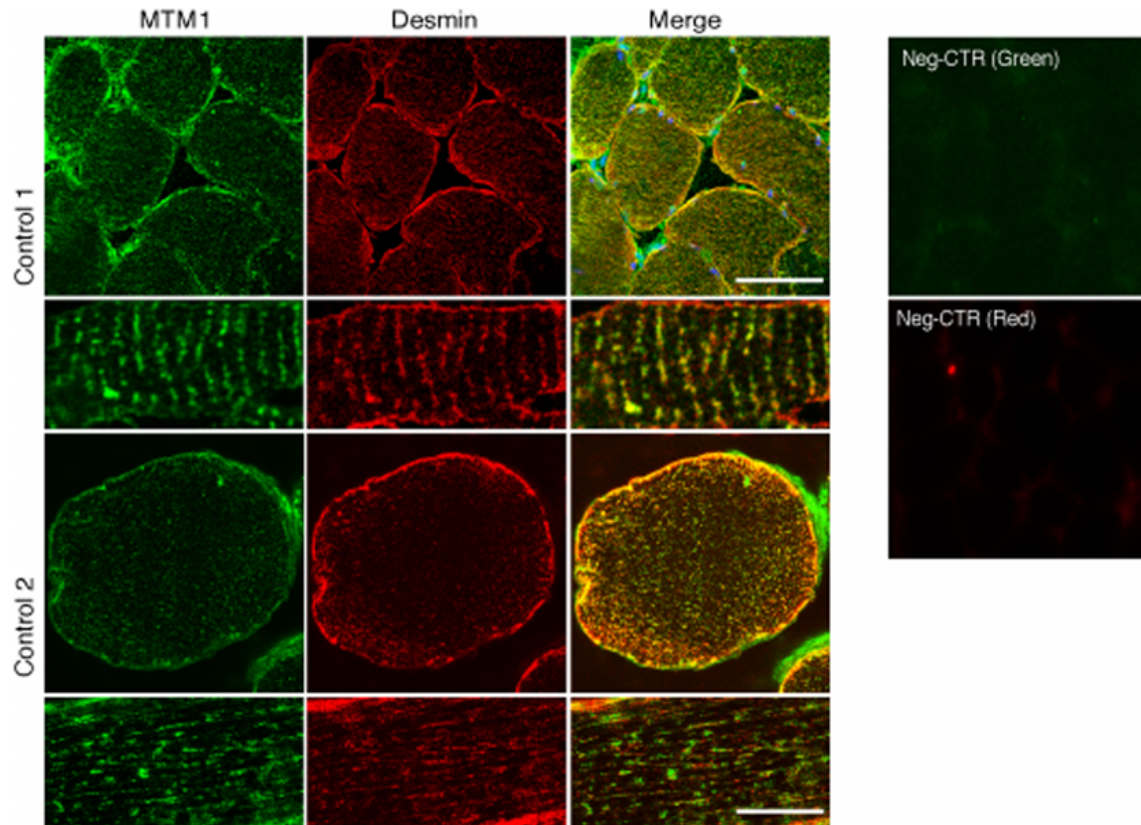

**Supplementary Figure 1**

MTM1 co-localizes with desmin in human muscle. Confocal analysis of transversal and longitudinal sections from two human control muscle biopsies (control 1 is 24 years-old and control 2 is 42 years-old) showing partial overlap between MTM1 and desmin at the sarcolemma and at the Z-disc. Scale bars = 50 $\mu$ m.

## Supplementary Figure 2

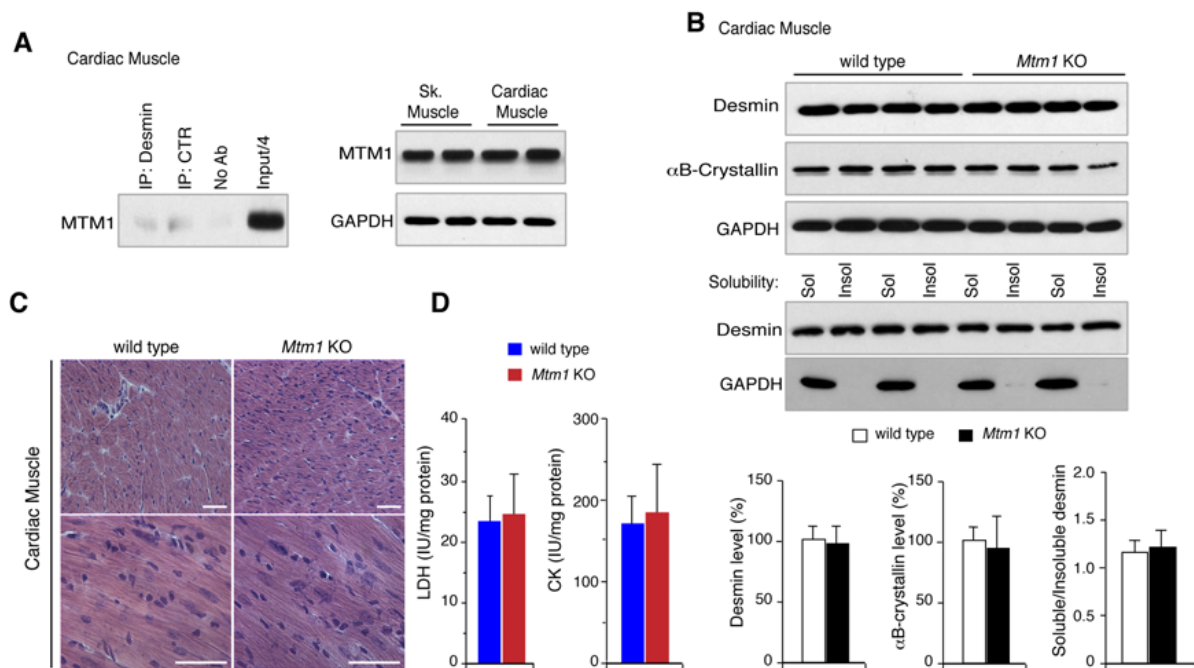

**Supplementary Figure 2: (A)** Desmin failed to immunoprecipitate MTM1 from cardiac muscle (right panel). Immunoblot of MTM1 in cardiac and skeletal muscle showed similar expression profile in both muscles (left panel). **(B)** Equivalent expression level of desmin and  $\alpha$ B-crystallin in *Mtm1* vs. wild type cardiac muscle (upper panel). *Mtm1* knockout expression from heart did not affect desmin solubility. Sol indicates soluble fraction and Insol means insoluble material after final centrifugation (see methods) and solubilisation with 8M-urea extraction buffer (lower panel). GAPDH is a loading control. Data correlated from N=2 individual experiments and significance was set at  $*P < 0.05$ . **(C)** Transversal and longitudinal sections of wild type and *Mtm1* KO hearts stained with Haematoxylin and eosin (H&E) showed no myocardial fibrosis (myocyte injury and necrosis) in *Mtm1* KO muscle. All the analysed mice are 5 weeks old and *Mtm1* KO mice have the characterised severe muscle atrophy at that age. **(D)** LDH (lactate dehydrogenase) and CK (creatin kinase) level in cardiac muscle from wild type and *Mtm1* KO mice. No variations were noted in these enzymes. Data correlated from two individual experiments ( $n=6$  for wild type mice and  $n=7$  for *Mtm1* KO mice) and significance was set at  $*P < 0.05$ . Scale bars =  $50\mu\text{m}$ .



## Supplementary Figure 3

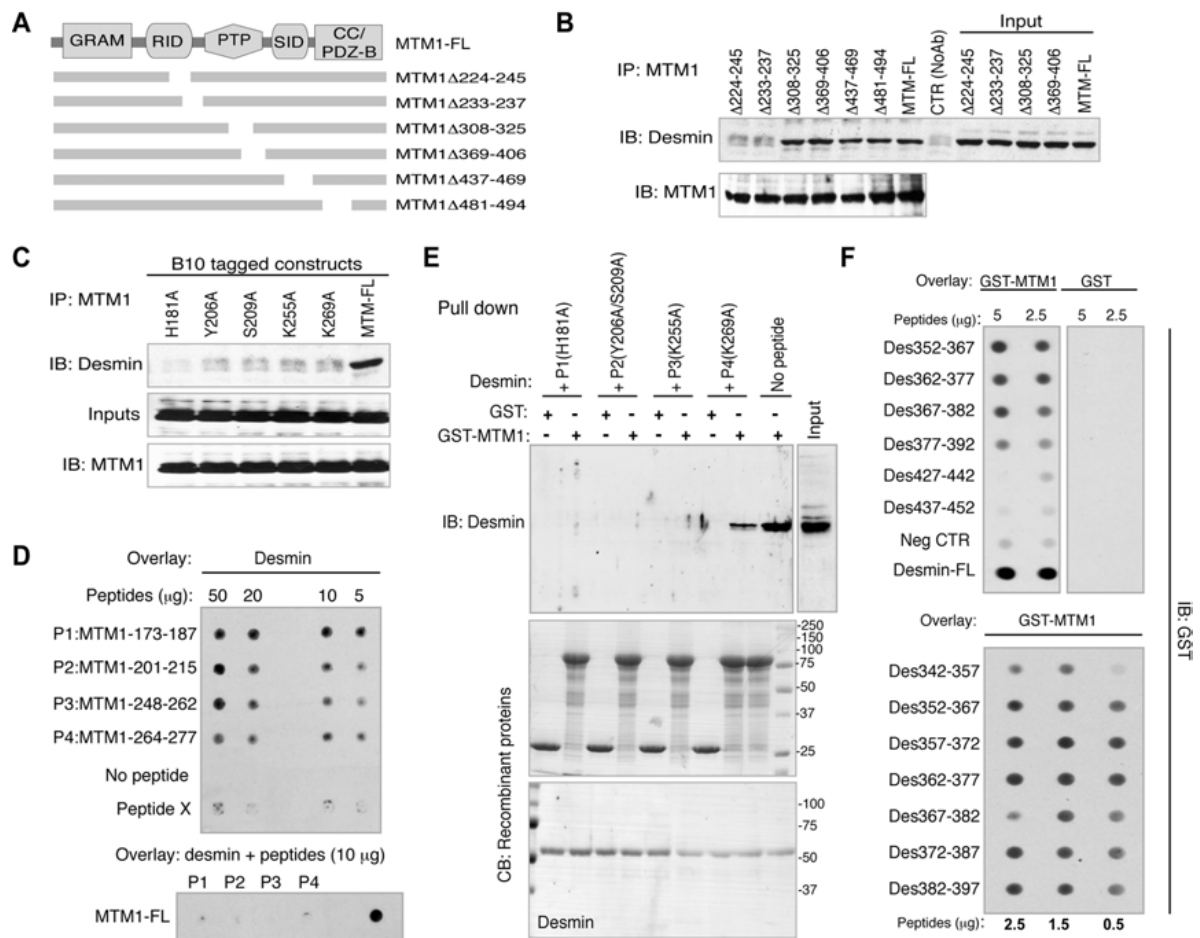

**Supplementary Figure 3:** Mapping the interaction domains on MTM1 and desmin. **(A)** Diagrammatic representation of MTM1 deletion constructs employed in co-immunoprecipitation studies. **(B)** Co-immunoprecipitation using anti-MTM1 specific antibodies was performed from co-transfected cells with desmin and MTM1 full length or specified deletion constructs. Immune-bound complexes were analysed by immunoblot with anti-desmin antibody (top panel) and MTM1 antibody (bottom panel). MTM1 $\Delta$ 224-245 and MTM1 $\Delta$ 233-237 do not interact with desmin. **(C)** Co-immunoprecipitation studies employing anti-B10 antibodies from cells lysates co-transfected with desmin and B10 tagged wild type or mutated MTM1 constructs. Immune-bound complexes were revealed with anti-desmin antibody (top panel) and anti-MTM1 antibody (bottom panel). Levels of ectopically expressed desmin are shown (middle panel). **(D)** Peptide mapping and competition to define the MTM1 binding domain. Top panel: Desmin overlay on MTM1 peptides encoding the 4 implicated loops (P1:MTM173-187, P2:MTM201-215, P3:MTM248-262, P4:MTM264-277), revealed with the desmin antibody. Bottom panel: MTM1-FL spotted on membrane was overlaid with desmin preincubated with excess of peptides (P1-P4). **(E)** Recombinant desmin alone or combined with specified mutated peptides was incubated with GST-MTM1 or GST. Coomassie blue stained gels showed GST and GST-MTM1 recombinant proteins (middle panel) and purified recombinant desmin (bottom panel) that were used for GST-pull down competition experiment. **(F)** Peptide mapping experiment using overlapping peptides of the 342-456 desmin sequence dotted on nitrocellulose membrane and overlaid by GST or GST-MTM1 recombinant proteins.

## Supplementary Figure 4

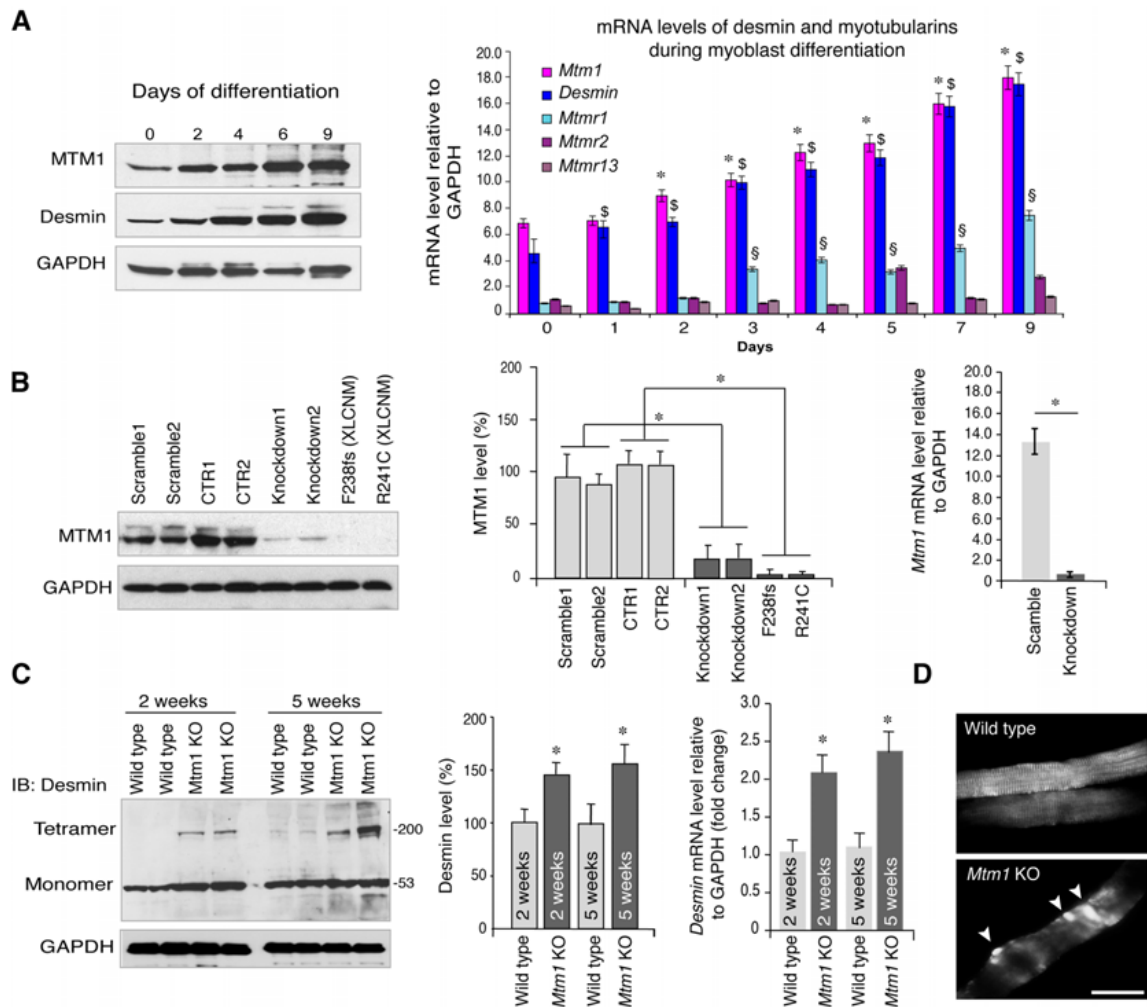

**Supplementary Figure 4:** Characterization of *Mtm1* knockdown C2C12 cell line and exploring desmin expression and localization in MTM1 deficient cells and muscle. **(A)** Expression of MTM1 and desmin during muscle cell differentiation employing MTM1 and desmin-specific antibodies (left panel). Quantification of mRNA levels of *desmin* and *Mtm1*, during myoblast differentiation was determined by quantitative RT-PCR compared to *Gapdh* or *Mhc* (right panel). **(B)** Characterization of *Mtm1* knockdown (KD) C2C12 cells. 3 clones were generated and 2 are presented here for protein and mRNA quantification comparatively to XLCNM myoblast carrying mutations leading to depletion (F238fs) or strong decrease (R241C) of MTM1 expression. Data correlated from N=3 individual experiments, n=3 separate cell culture extracts (middle and right panels) and significance was set at \*P < 0.05. **(C)** Overexpression of desmin in *Mtm1* knockout (KO) muscle. Western blot analysis of muscle extracts from control and *Mtm1* KO muscles at 2 weeks and 5 weeks employing anti-desmin and anti-GAPDH specific antibodies. The 200-kDa bands detected by the desmin antibody in *Mtm1* KO muscle correspond potentially to a detergent-resistant desmin tetramer. Quantification of protein and mRNA levels of *Desmin* in control and *Mtm1* KO skeletal muscle (at 2 and 5 weeks). N= 4 individual experiments and n = 2 mice per experiment, significance was set at \*P < 0.05. **(D)** Isolated fibres from *Mtm1* KO (2-weeks) muscle showed Desmin aggregates in the subsarcolemmal and intermyofibrillar compartments (arrowheads) compared to wild type muscle fibres. Scale bars represent 20µm.

## Supplementary Figure 5

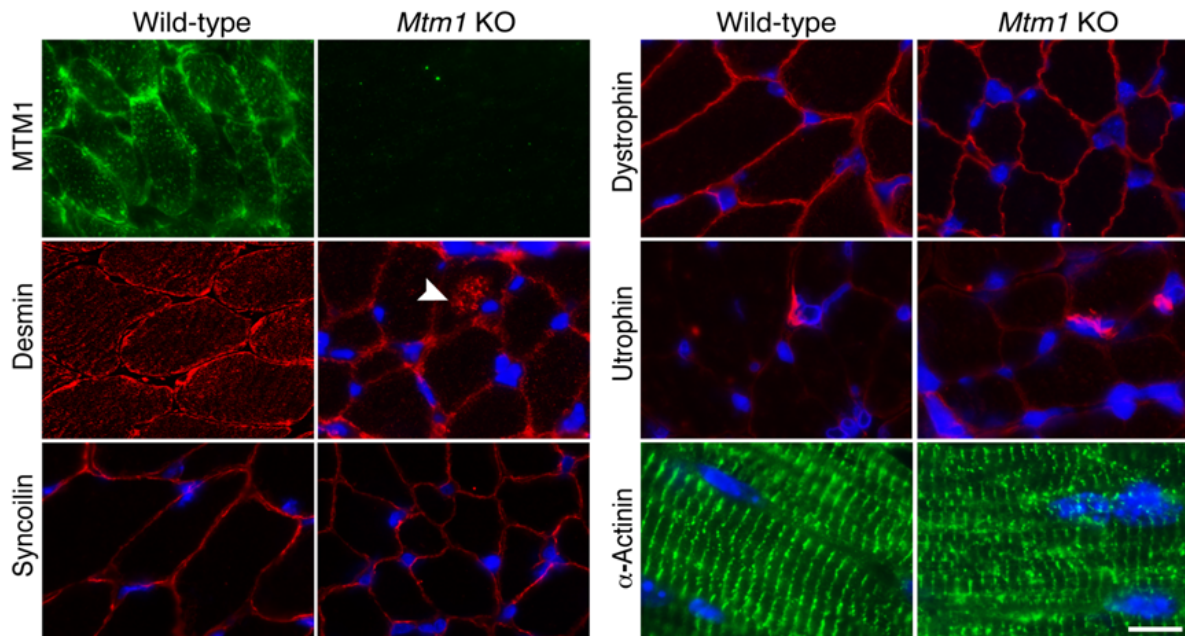

**Supplementary Figure 5:** Specific accumulation of desmin in *Mtm1* KO muscle. Immunolocalisation of syncoilin, dystrophin, utrophin, α-actinin (Z-disc protein) and titin (M-line protein) in 2-week old control and *Mtm1* KO muscles. Accumulation of desmin was observed in *Mtm1* KO muscle fibers (arrowheads) but not the other tested protein. Scale bars represent 20µm.

## Supplementary Figure 6

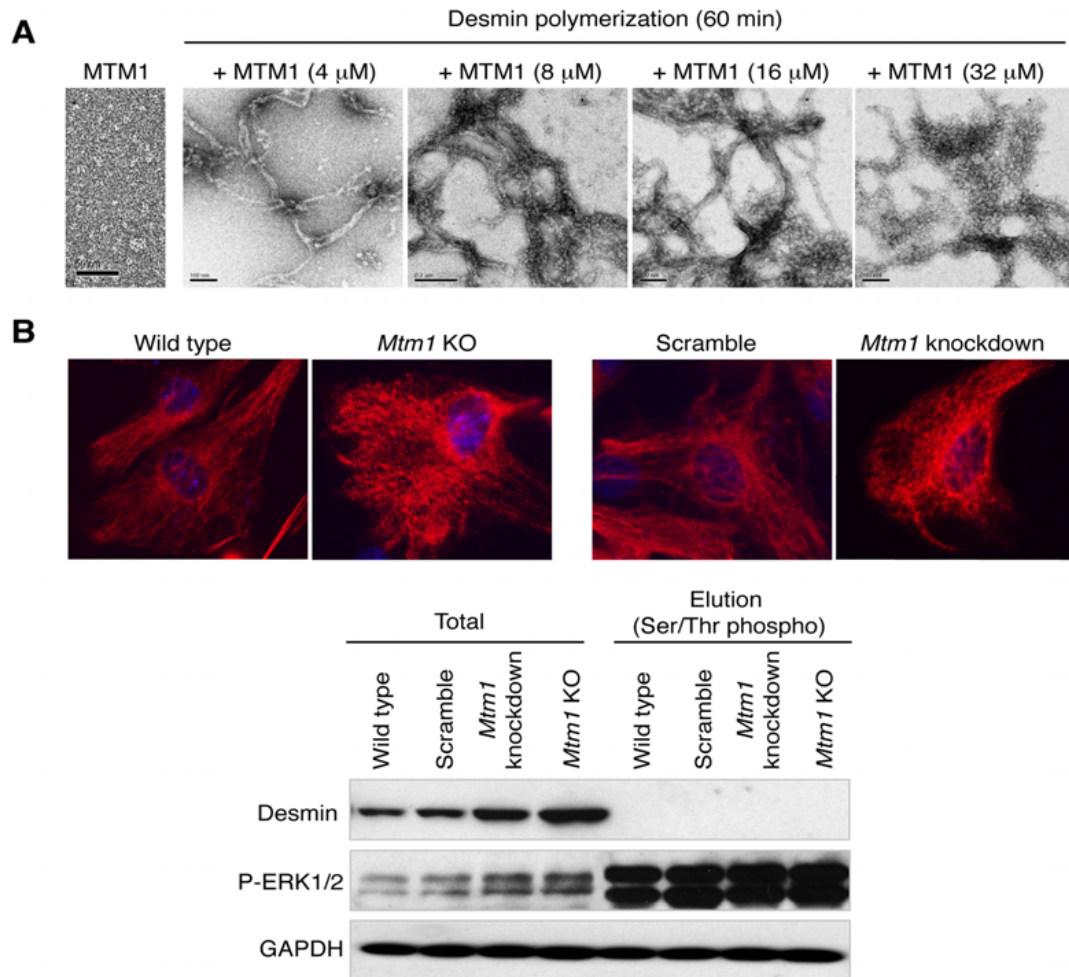

**Supplementary Figure 6:** Impact of MTM1 on desmin filaments assembly. **(A)** MTM1 affects desmin filament structure. Recombinant desmin (10  $\mu$ M) was mixed with increasing concentrations of recombinant MTM1 (cleaved from GST tag) and desmin filament assembly was monitored by electron microscopy after 60 min of assembly. Addition of MTM1 (4  $\mu$ M) led to the formation of ribbon-like, bifurcating and branching filaments with more variable width and length. Excess of MTM1 (8-32  $\mu$ M) inhibit completely filaments formation. **(B)** Desmin filament collapse/aggregation in *Mtm1* KO and knockdown myoblasts is not promoted by desmin phosphorylation. Immunoblot of desmin before (Total) and after elution from Ser/thr Phospho-enrichment column. ERK1/2 and GAPDH were analysed as positive and loading controls, respectively.

## Supplementary Figure 7

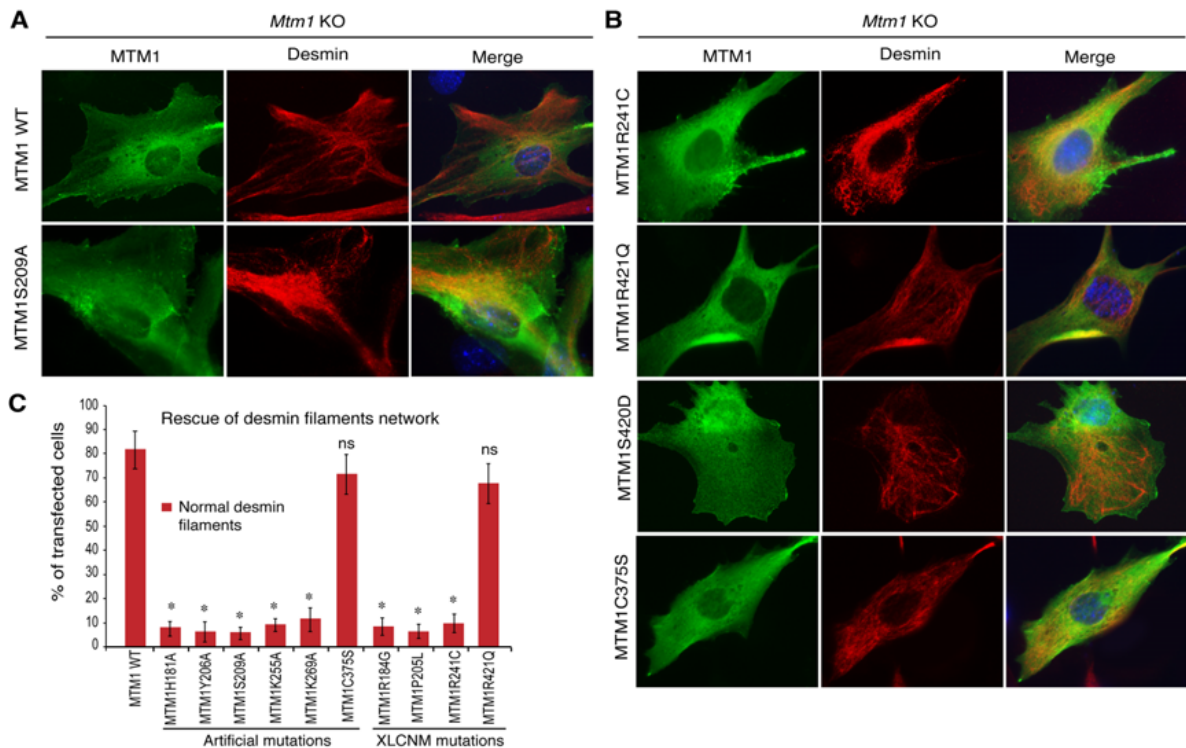

**Supplementary Figure 7:** Rescue of desmin filaments in *Mtm1* KO myoblasts. **(A)** Overexpression of wild type MTM1 but not mutated constructs (in the interaction sites with desmin) re-establishes normal desmin filament network in *Mtm1* KO myoblast (see also supplementary figure 7A). **(B)** XLCNM mutation R421Q and the artificial mutations S420D and C375S could re-establish normal desmin filament in *Mtm1* KO cells but not the XLCNM mutation R241C, suggesting that only MTM1 mutations situated in the interaction sites with desmin are not able to rescue desmin filaments network. **(C)** Quantification of the impact of all tested MTM1 mutations on filament network in *Mtm1* KO cells. Approximately 100 transfected cells were counted over 3 independent experiments. The significance was set at \* $P < 0.05$ .

## Supplementary Figure 8

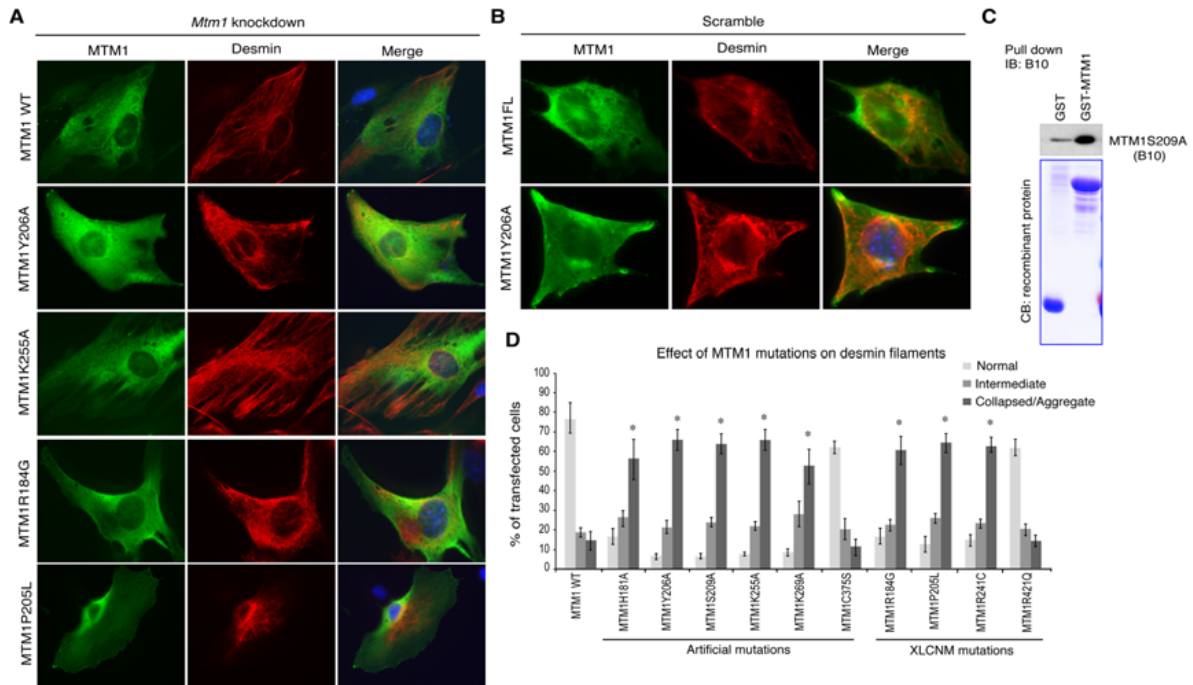

**Supplementary Figure 8:** Effects of MTM1 mutations on desmin filaments **(A)** Overexpression of wild type MTM1 but not mutated constructs (in the interaction sites with desmin) re-establishes normal desmin filament network in *Mtm1* Knockdown cells similarly to *Mtm1* KO cells (Supplementary Figure 7). **(B)** Overexpression of wild type MTM1 does not impact on desmin network in control C2C12 cells (Scramble) but overexpression of mutated MTM1 proteins carrying point mutations within the interaction sites with desmin (artificial or patient's mutations) lead to collapsed/aggregating desmin filaments. These mutated proteins may promote a dominant negative effect by binding the endogenous MTM1 protein **(C)** and disrupting its interaction with desmin. Quantification of the impact of MTM1 mutations on filament network in C2C12 cells. Approximately 80 to 100 transfected cells per experiment were counted over 3 independent experiments. The significance was set at \* $P < 0.05$ .

## Supplementary Figure 9

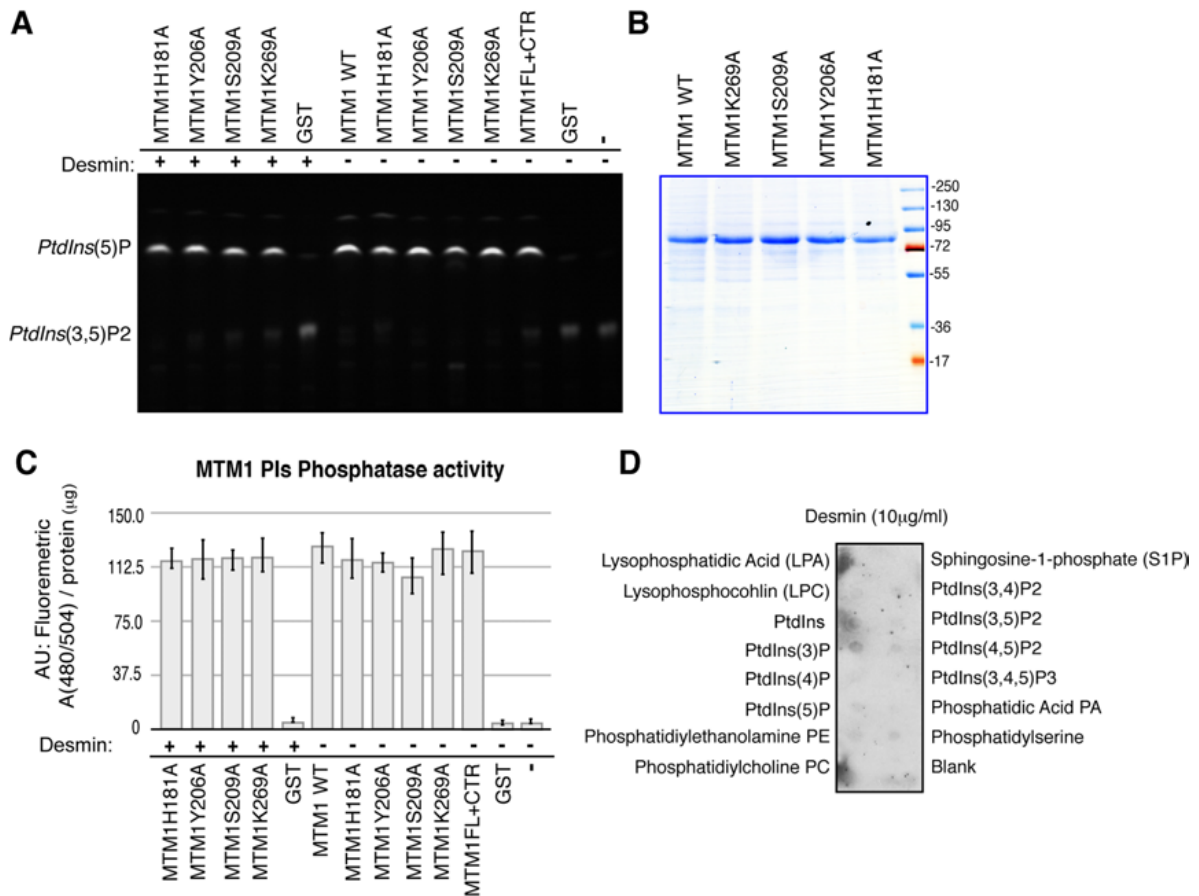

**Supplementary Figure 9:** Impact of MTM1 mutations in the desmin interaction sites on PIs phosphatase activity in vitro. **(A)** PtdIns(3,5)P<sub>2</sub> dephosphorylation to PtdIns5P by wild type or mutated MTM1 constructs (H181A, Y206A, S209A and K269A) alone or combined to desmin recombinant protein. **(B)** Coomassie blue stained gel of the MTM1 GST-fusion constructs employed for the enzymatic assay (right panel). **(C)** Quantification of the phosphatase activity: intensities of PtdIns5P and PtdIns(3,5)P<sub>2</sub> spots were measured at A(480/504) and expressed as a ratio on the recombinant protein quantity. Fluoremetric measurements were made twice and their averages were used. Data correlated from two individual experiments and significance was set at \*P<0.05. **(D)** Desmin did not bind directly to lipids. A fat blot of specified lipids was overlaid with recombinant desmin (10 µg/ml), followed by probing with desmin specific antibodies.

## Supplementary Figure 10

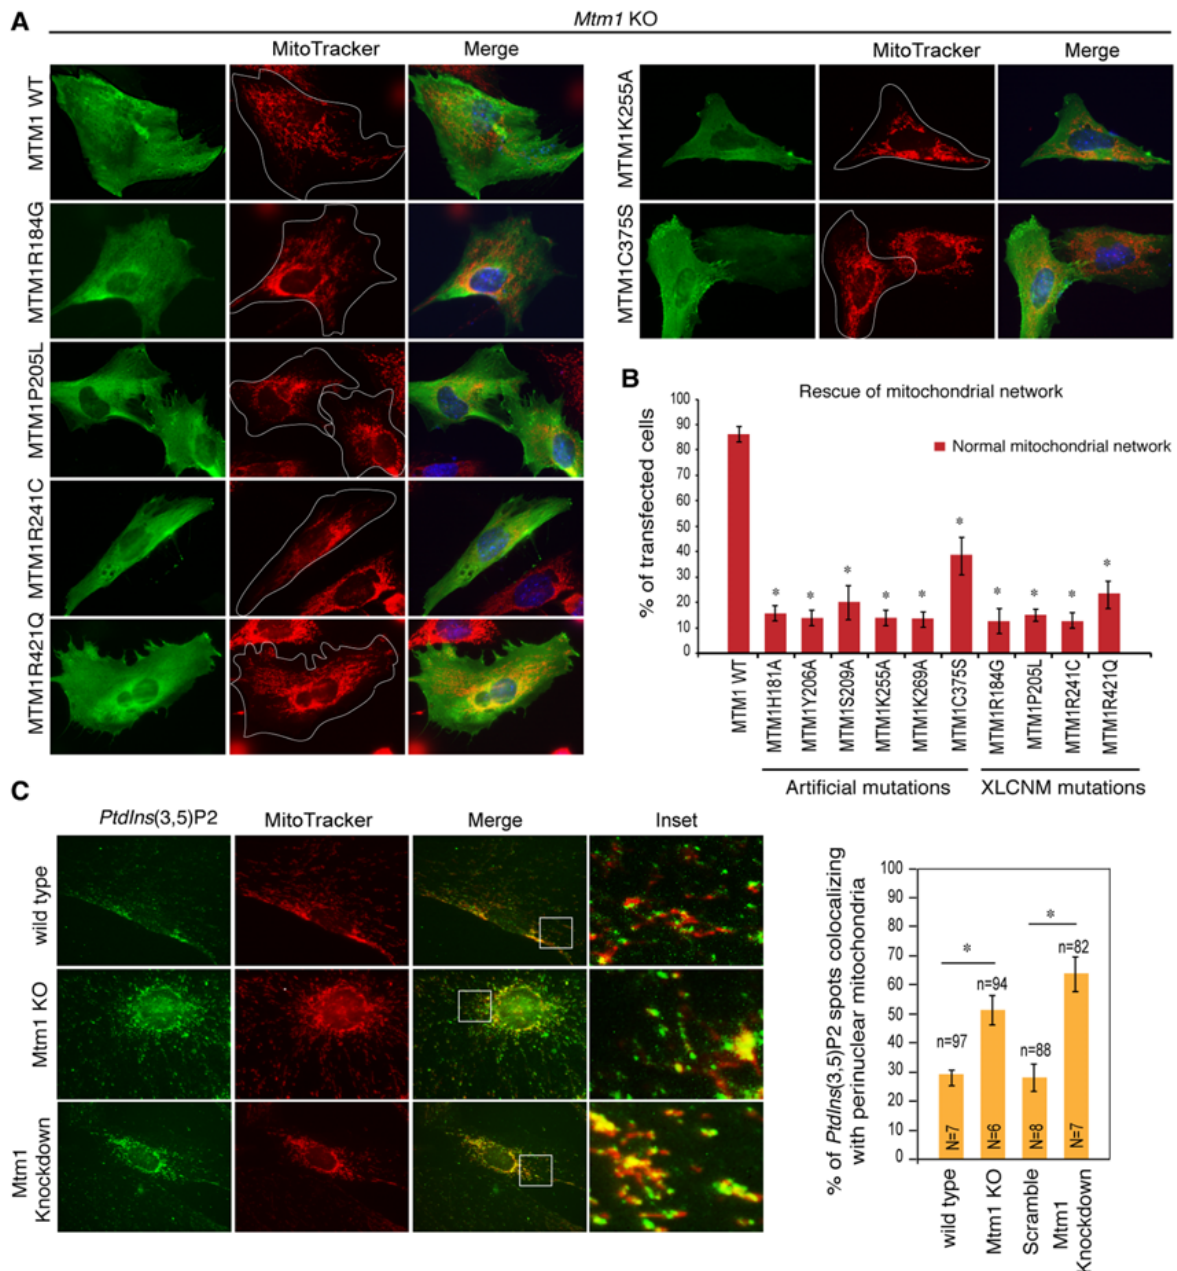

**Supplementary Figure 10:** (A) MTM1 mutations fail to restore mitochondria network in *Mtm1* KO cells. Overexpression of wild type MTM1 but not mutated constructs (artificial and XLCNM mutations) did not rescue mitochondrial shape/network in *Mtm1* KO myoblast. (B) Quantification of the impact of MTM1 mutations on mitochondrial shape in *Mtm1* KO cells compared to MTM1 wild type (WT). Approximately 150 transfected cells were counted over 2 independent experiments. The significance was set at \* $P < 0.05$ . (C). PtdIns(3,5)P<sub>2</sub> immunodetection in wild type and *Mtm1* KO/knockdown cells showed a similar profile as mitochondria. Perinuclear accumulation of PtdIns(3,5)P<sub>2</sub> and mitochondria in MTM1 deficient cells showed also partial overlapping between the PI and MitoTracker, suggesting a potential role of MTM1 substrate PtdIns(3,5)P<sub>2</sub> in mitochondrial homeostasis or a cytotoxic effect of PI accumulation on mitochondrial function.



## Supplementary Figure 11

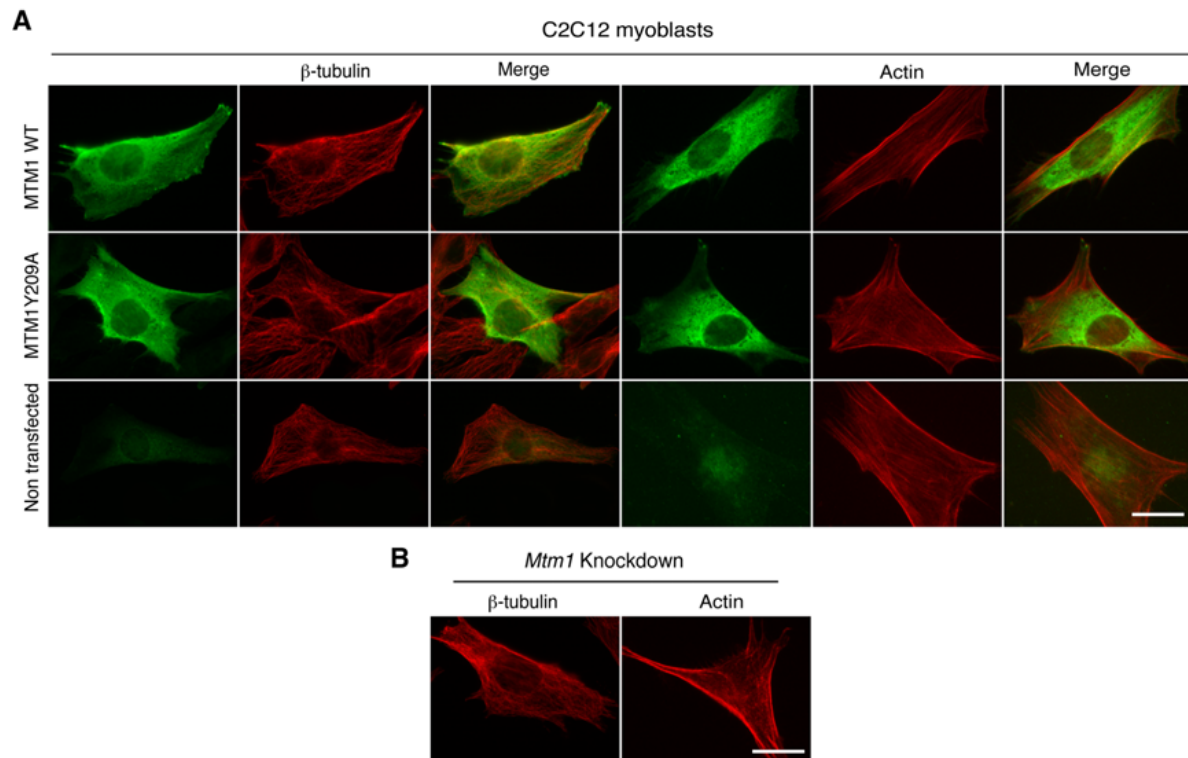

**Supplementary Figure 11.** Disruption of MTM1-Desmin interaction does not impact on MTs and MFs networks. **(A)** Overexpression of wild type or mutated MTM1 constructs (that did not bind desmin) in C2C12 cells did not affect microtubules (MTs) and actin filaments (MFs) architecture. C2C12 cells transfected with specified B10-tagged MTM1 constructs were processed with anti-B10 and anti- $\beta$  tubulin or anti-actin antibodies. **(B)** The morphology of MTs and MFs of *Mtm1* KD C2C12 cells. Scale bar=50  $\mu$ m.

## Supplementary Figure 12

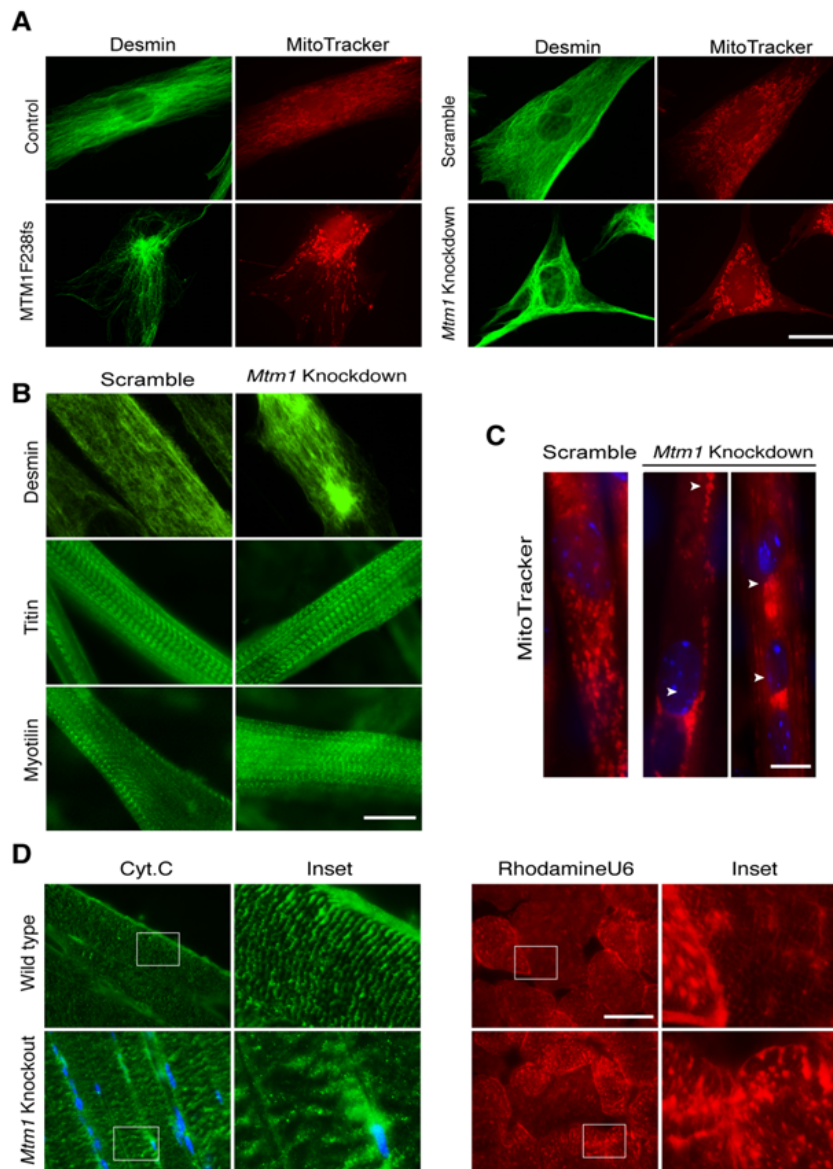

**Supplementary Figure 12:** (A) Desmin and mitochondria collapse in XLCNM patient myoblasts, *Mtm1* knockdown cells and *Mtm1* KO muscle. Control vs. MTM1F238fs patient myoblasts and scramble vs. *Mtm1* KD cells were processed for imaging following incubation with MitoTracker red and anti-desmin specific antibodies. Desmin and mitochondria collapsed around nuclei in XLCNM and *Mtm1* KD C2C12 cells. (B) Desmin aggregates were present in *Mtm1* KD myotubes. Control or *Mtm1* KD C2C12 myotubes were processed for imaging with anti-desmin, anti-titin or anti-myotilin specific antibodies. Desmin formed aggregates in KD cells whereas, titin (A-I line) and myotilin (z-line) showed similar localisation between control and *Mtm1* KD myotubes. Scale bar=50  $\mu$ m. (C) Mitochondria network is also altered in *Mtm1* KD myotubes with a specific accumulation between nuclei myotubes (arrowheads). Scale bar=50 $\mu$ m. (D) Subsarcolemmal and intermyofibrillar mitochondria are disorganised in *Mtm1* KO muscles. Longitudinal muscle sections from control and *Mtm1* KO mice were probed with anti-cytochrome *c* antibody. Mitochondria accumulation was detected in muscle transversal sections from *Mtm1* KO mice after injection with the RhodamineU6 probe. Scale bars=50  $\mu$ m.

## Supplementary Figure 13

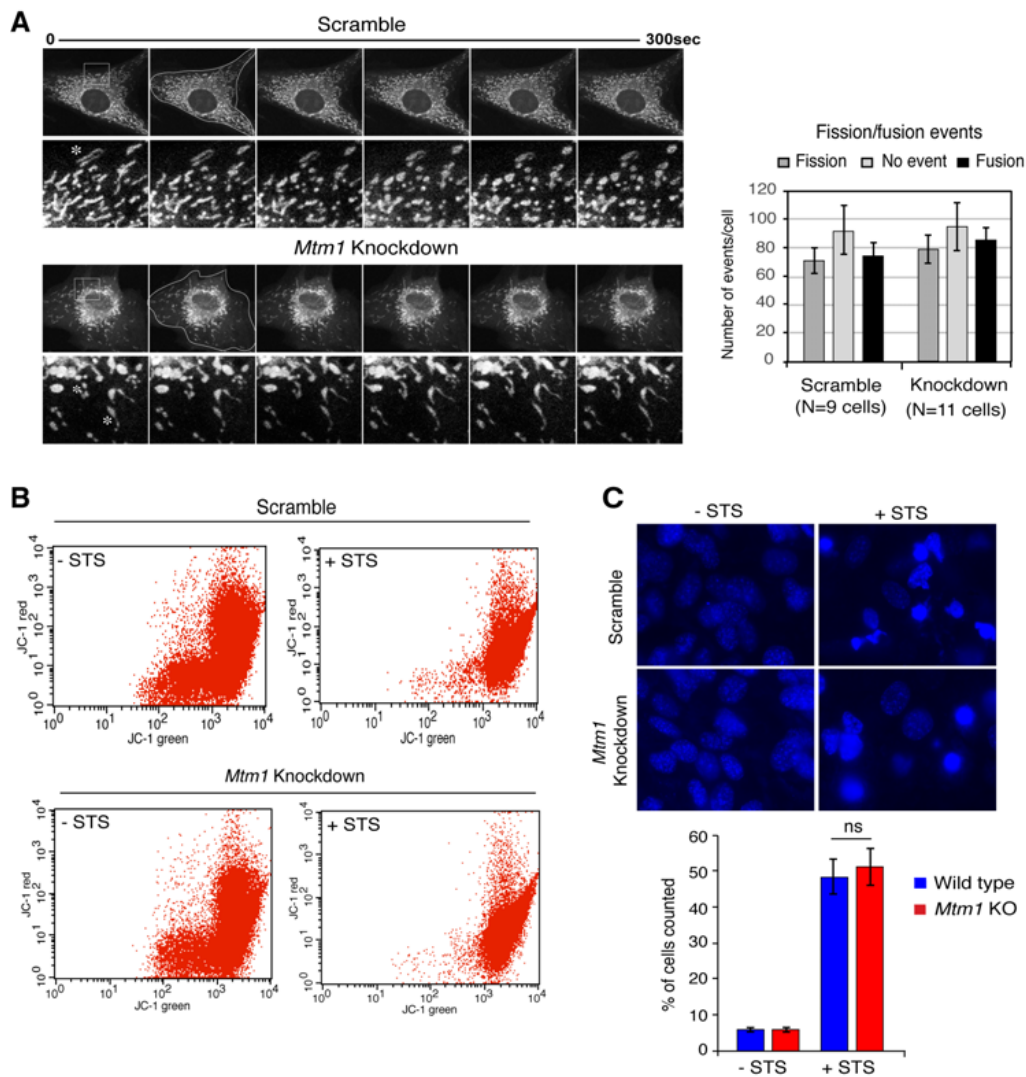

**Supplementary Figure 13:** Mitochondrial fission/fusion and susceptibility to apoptosis in *Mtm1* Knockdown cells are not affected. **(A)** Mitochondrial dynamics of control and *Mtm1* KD C2C12 cells were monitored over 300 sec by time-lapse microscopy (left panel). Quantification of mitochondrial fission and fusion events in control and *Mtm1* KD C2C12 cells (right panel). Mitochondria were counted individually in 3 distinct regions of the cell. Around 50 mitochondrial entities were scored as dividing (fission) or fusing (fusion) or neither (no event) per region from 9 control C2C12 cells (N=9) and from 11 *Mtm1* KD cells (N=11). Data correlated from 2 independent experiments and significance was set at \*P < 0.05. **(B)** *Mtm1* KD did not impact on mitochondrial transmembrane potential. Control and *Mtm1* KD C2C12 cells were incubated with JC-1 and were analysed by FACS. Samples previously treated with 1mM staurosporine (STS) were also included in the assay. No significant shift in the profile of control versus *Mtm1* KD samples was observed. **(C)** Knockdown *Mtm1* in muscle cells did not increase susceptibility to apoptotic events. Control and *Mtm1* KD C2C12 cells were treated with (STS) and the morphology of their nuclei (stained with Hoechst) was analysed by confocal microscopy (left panel). Cells with condensed or fragmented DNA (with or without STS treatment) were scored (right panel). Data correlated from 2 independent experiments using 4 different cell batches. Approximately 120 cells were counted for each sample and significance was set at \*P < 0.05.
